# Supplementary material for: The role of plant community development in wind erosion mitigation post-wildfire
Source: Research Square preprint supplement (doi:10.21203/rs.3.rs-7436010/v1), 2025-09-15
Supplement: Supplementary file 1 [file 41f805410698f3bd0f3fc5b7.docx]

Table S1 Model fits for power model flux integration of sediment traps. When four heights were used, flux was fit according to f(flux)= where x is the measured flux at a given height and A,B, and C are fitting parameter. When only 3 heights had a flux measurement the fit was made according to q(Flux)=.

| Site Name | Sample mast ID | Collection Date | Total Flux (g/m/d) | R2 | A | B | C |
| --- | --- | --- | --- | --- | --- | --- | --- |
| RedHills | A1 | 8/13/2019 | 43.4444 | 1 | 219.96 | 5.03 | NA |
| RedHills | A1 | 9/9/2019 | 96.8827 | 0.99 | 378.2 | 3.82 | NA |
| RedHills | A1 | 10/16/2019 | 34.2033 | 0.99 | 159.63 | -7.05 | 5.1 |
| RedHills | A1 | 11/20/2019 | 13.3845 | 0.96 | 41.15 | -5.3 | 4.25 |
| RedHills | A1 | 1/8/2020 | 7.62236 | 1 | 1.4 | 14.2 | -19.31 |
| RedHills | A1 | 2/26/2020 | 31.0209 | 1 | 97.03 | -3.47 | 1.02 |
| RedHills | A1 | 5/6/2020 | 26.6925 | 0.92 | 89.63 | -4.72 | 2.88 |
| RedHills | A1 | 6/11/2020 | 41.4893 | 1 | 71.62 | -1.03 | -0.31 |
| RedHills | A1 | 7/27/2020 | 15.5425 | 0.81 | 55.32 | -6.18 | 5.02 |
| RedHills | A1 | 9/22/2020 | 47.2603 | 0.94 | 72.28 | -0.21 | -1.2 |
| RedHills | A1 | 11/5/2020 | 13.4212 | 0.95 | 22.33 | -0.9 | -0.37 |
| RedHills | A1 | 12/8/2020 | 15.3313 | 1 | 45.68 | -3.08 | 0.55 |
| RedHills | A1 | 4/19/2021 | 6.7447 | 0.96 | 10.95 | 0.17 | -2.16 |
| RedHills | A1 | 5/24/2021 | 27.2652 | 0.94 | 33.65 | 1.03 | -2.43 |
| RedHills | A1 | 7/8/2021 | 44.963 | 0.99 | 73.65 | -1.18 | 0.16 |
| RedHills | A1 | 8/11/2021 | 14.2142 | 0.89 | 17.46 | 1.14 | -2.6 |
| RedHills | A1 | 9/9/2021 | 5.46331 | 0.99 | 8.87 | -0.73 | -0.57 |
| RedHills | A1 | 12/3/2021 | 69.8744 | 0.99 | 135.82 | -1.05 | -0.83 |
| RedHills | A1 | 3/16/2022 | 4.44828 | 0.43 | 3.62 | 1.49 | -1.64 |
| RedHills | A1 | 5/17/2022 | 6.02522 | 0.99 | 6.24 | 1.03 | -1.73 |
| RedHills | A1 | 8/25/2022 | 8.39928 | 0.75 | 17.47 | 1.7 | NA |
| RedHills | A1 | 10/20/2022 | 2.92891 | 0.92 | 8.35 | -4.84 | 3.83 |
| RedHills | A2 | 8/13/2019 | 34.4919 | 1 | 155.32 | -5.66 | 2.75 |
| RedHills | A2 | 9/9/2019 | 85.3379 | 0.96 | 206.55 | 2.13 | NA |
| RedHills | A2 | 10/16/2019 | 23.4222 | 0.83 | 67.57 | 2.69 | NA |
| RedHills | A2 | 11/20/2019 | 8.07714 | 0.97 | 22.67 | 2.6 | NA |
| RedHills | A2 | 1/8/2020 | 6.71021 | 0.96 | 0.01 | 30.96 | -29.28 |
| RedHills | A2 | 2/26/2020 | 28.019 | 0.99 | 116.13 | -5.9 | 3.78 |
| RedHills | A2 | 5/6/2020 | 22.5155 | 0.98 | 36.23 | -1.09 | 0.09 |
| RedHills | A2 | 6/11/2020 | 25.3163 | 0.6 | 25.51 | 0.36 | -0.57 |
| RedHills | A2 | 7/27/2020 | 12.158 | 0.97 | 15.46 | 0.5 | NA |
| RedHills | A2 | 9/22/2020 | 41.3638 | 1 | 55.56 | -0.28 | -0.54 |
| RedHills | A2 | 11/5/2020 | 9.11815 | 0.96 | 15.91 | -1.95 | 1.17 |
| RedHills | A2 | 12/8/2020 | 7.74256 | 1 | 17.78 | -4.1 | 3.49 |
| RedHills | A2 | 4/19/2021 | 4.6015 | 0.58 | 4.43 | 2 | -3.08 |
| RedHills | A2 | 5/24/2021 | 17.7117 | 0.84 | 9.86 | 3.36 | -3.37 |
| RedHills | A2 | 7/8/2021 | 31.998 | 0.91 | 27.03 | 0.88 | -0.82 |
| RedHills | A2 | 8/11/2021 | 11.1964 | 0.91 | 11.28 | 0.66 | -1.03 |
| RedHills | A2 | 9/9/2021 | 3.74635 | 0.95 | 3.61 | 0.95 | -1.35 |
| RedHills | A2 | 12/3/2021 | 43.1638 | 1 | 77.03 | -1.89 | 0.98 |
| RedHills | A2 | 3/16/2022 | 5.16818 | 0.99 | 8.51 | 1.1 | NA |
| RedHills | A2 | 5/17/2022 | 5.39241 | 1 | 7.86 | 0.81 | NA |
| RedHills | A2 | 7/2/2022 | 5.31727 | 0.4 | 4.66 | -0.26 | NA |
| RedHills | A2 | 10/20/2022 | 1.97703 | 0.58 | 1.86 | -0.07 | 0.29 |
| RedHills | A3 | 8/13/2019 | 31.9922 | 0.99 | 116.54 | 3.54 | NA |
| RedHills | A3 | 9/9/2019 | 42.1499 | 0.95 | 81.05 | -1.35 | -0.24 |
| RedHills | A3 | 10/16/2019 | 19.7014 | 0.46 | 29.08 | -1.48 | 1.02 |
| RedHills | A3 | 11/20/2019 | 9.90343 | 0.4 | 6.53 | 1.38 | -0.86 |
| RedHills | A3 | 1/8/2020 | 6.51188 | 0.99 | 2.61 | -2 | 4.56 |
| RedHills | A3 | 2/26/2020 | 25.8556 | 1 | 71.23 | -3.43 | 1.66 |
| RedHills | A3 | 5/6/2020 | 23.3325 | 1 | 31.06 | 0.69 | -2.16 |
| RedHills | A3 | 6/11/2020 | 26.8714 | 0.99 | 21.72 | 1.48 | -1.6 |
| RedHills | A3 | 7/27/2020 | 12.9719 | 1 | 20.35 | 0.98 | NA |
| RedHills | A3 | 9/22/2020 | 51.6557 | 0.99 | 107.88 | -2.36 | 1.11 |
| RedHills | A3 | 11/5/2020 | 10.8659 | 0.98 | 23.24 | -2.52 | 1.28 |
| RedHills | A3 | 12/8/2020 | 9.06085 | 0.99 | 19.06 | -2.87 | 1.92 |
| RedHills | A3 | 4/19/2021 | 6.79914 | 1 | 16.3 | -2.4 | 0.54 |
| RedHills | A3 | 5/24/2021 | 26.6668 | 1 | 56.4 | -2.39 | 1.11 |
| RedHills | A3 | 7/8/2021 | 44.1361 | 0.93 | 113.54 | -3.98 | 2.88 |
| RedHills | A3 | 8/11/2021 | 16.8123 | 1 | 31.64 | -1.86 | 0.72 |
| RedHills | A3 | 9/9/2021 | 8.71987 | 0.96 | 21.9 | -3.62 | 2.4 |
| RedHills | A3 | 12/3/2021 | 56.2284 | 0.98 | 140.1 | -3.38 | 2.05 |
| RedHills | A3 | 5/17/2022 | 5.52176 | 0.92 | 6.64 | -0.5 | 0.18 |
| RedHills | A3 | 7/2/2022 | 5.75443 | 0.9 | 14.54 | -4.64 | 3.96 |
| RedHills | A3 | 8/25/2022 | 7.13908 | 0.79 | 15.48 | -3.86 | 3.33 |
| RedHills | A3 | 10/20/2022 | 2.06742 | 0.98 | 3.92 | -3.33 | 2.98 |
| RedHills | B1 | 8/13/2019 | 27.5206 | 0.98 | 130.76 | 4.71 | NA |
| RedHills | B1 | 9/9/2019 | 54.3096 | 0.01 | 57.73 | 0.12 | NA |
| RedHills | B1 | 10/16/2019 | 23.9891 | 1 | 48.11 | -3.86 | 3.57 |
| RedHills | B1 | 11/20/2019 | 18.3056 | 1 | 53.27 | -5.99 | 5.47 |
| RedHills | B1 | 1/8/2020 | 2.63852 | 0.97 | 5.4 | -2.53 | 1.47 |
| RedHills | B1 | 2/26/2020 | 21.2558 | 0.98 | 54.56 | -2.1 | -0.41 |
| RedHills | B1 | 5/6/2020 | 12.7851 | 0.94 | 18.05 | 0.73 | NA |
| RedHills | B1 | 6/11/2020 | 12.7052 | 0.66 | 17.09 | -1.48 | 1.32 |
| RedHills | B1 | 7/27/2020 | 8.76901 | 0.94 | 12.1 | -0.91 | 0.35 |
| RedHills | B1 | 9/22/2020 | 29.5443 | 1 | 51.02 | -1.82 | 0.99 |
| RedHills | B1 | 11/5/2020 | 4.14857 | 0.99 | 11.75 | -4.21 | 2.85 |
| RedHills | B1 | 12/8/2020 | 3.11982 | 0.92 | 10.14 | -6.2 | 5.39 |
| RedHills | B1 | 4/19/2021 | 3.27693 | 0.95 | 5.02 | -1.27 | 0.56 |
| RedHills | B1 | 5/24/2021 | 8.75825 | 0.63 | 7.37 | 0.65 | -0.46 |
| RedHills | B1 | 7/8/2021 | 23.4824 | 0.97 | 33.89 | -1.46 | 1.06 |
| RedHills | B1 | 8/11/2021 | 8.21054 | 0.58 | 9 | -0.11 | -0.12 |
| RedHills | B1 | 9/9/2021 | 2.37477 | 0.99 | 1.54 | 2.47 | -2.46 |
| RedHills | B1 | 12/3/2021 | 22.8015 | 1 | 59.38 | -3.64 | 2.28 |
| RedHills | B1 | 3/16/2022 | 2.6445 | 0.04 | 2.94 | -0.32 | 0.16 |
| RedHills | B1 | 5/17/2022 | 3.1585 | 0.96 | 3.6 | -0.13 | -0.21 |
| RedHills | B1 | 7/2/2022 | 6.93277 | 0.97 | 11.89 | -3.63 | 3.71 |
| RedHills | B1 | 8/25/2022 | 6.07071 | 0.89 | 9.58 | 0.99 | NA |
| RedHills | B1 | 10/20/2022 | 1.3948 | 1 | 1.88 | -0.29 | -0.55 |
| RedHills | B2 | 8/13/2019 | 37.2887 | 1 | 149.97 | 3.94 | NA |
| RedHills | B2 | 9/9/2019 | 43.9821 | 0.98 | 91.81 | -1.68 | -0.05 |
| RedHills | B2 | 10/16/2019 | 20.962 | 0.87 | 27.64 | 0.58 | NA |
| RedHills | B2 | 11/20/2019 | 10.8811 | 0.99 | 34.22 | -3.67 | 1.36 |
| RedHills | B2 | 1/8/2020 | 2.22127 | 0.91 | 4.4 | -2.75 | 1.95 |
| RedHills | B2 | 2/26/2020 | 20.4214 | 0.97 | 56.29 | -3.74 | 2.19 |
| RedHills | B2 | 5/6/2020 | 13.5631 | 1 | 29.52 | -2.79 | 1.66 |
| RedHills | B2 | 6/11/2020 | 12.5805 | 0.76 | 12.05 | 0.35 | -0.39 |
| RedHills | B2 | 7/27/2020 | 7.00494 | 0.38 | 7.01 | -0.12 | 0.18 |
| RedHills | B2 | 9/22/2020 | 17.4821 | 0.14 | 23.1 | -2.17 | 2.36 |
| RedHills | B2 | 11/5/2020 | 3.9888 | 0.37 | 3.85 | 0.48 | -0.62 |
| RedHills | B2 | 12/8/2020 | 2.45927 | 0.9 | 7.3 | -4.98 | 3.89 |
| RedHills | B2 | 4/19/2021 | 1.48962 | 0.84 | 0.9 | 2.67 | -2.53 |
| RedHills | B2 | 5/24/2021 | 5.815 | 0.96 | 2.26 | 4.24 | -3.66 |
| RedHills | B2 | 7/8/2021 | 16.0808 | 0.08 | 15.51 | 0.26 | -0.28 |
| RedHills | B2 | 8/11/2021 | 5.03321 | 0.98 | 3.99 | 1.32 | -1.3 |
| RedHills | B2 | 9/9/2021 | 1.62918 | 1 | 2.34 | -1.18 | 0.64 |
| RedHills | B2 | 12/3/2021 | 21.8547 | 0.99 | 49.73 | -3.29 | 2.28 |
| RedHills | B2 | 5/17/2022 | 6.96181 | 1 | 4.53 | 2.13 | -1.93 |
| RedHills | B2 | 7/2/2022 | 6.63752 | 0.82 | 12.36 | -3.13 | 2.75 |
| RedHills | B2 | 8/25/2022 | 6.28918 | 0.42 | 8.65 | 0.68 | NA |
| RedHills | B2 | 10/20/2022 | 1.73121 | 1 | 2.3 | -1.05 | 0.71 |
| RedHills | B3 | 8/13/2019 | 32.614 | 1 | 154.04 | -6.56 | 4.15 |
| RedHills | B3 | 9/9/2019 | 23.893 | 0.98 | 32.06 | 0.62 | NA |
| RedHills | B3 | 10/16/2019 | 16.176 | 0.84 | 21.83 | -0.98 | 0.54 |
| RedHills | B3 | 11/20/2019 | 10.4193 | 0.79 | 11.27 | 1.6 | -2.86 |
| RedHills | B3 | 1/8/2020 | 1.93299 | 1 | 3.24 | -1.59 | 0.74 |
| RedHills | B3 | 2/26/2020 | 20.6986 | 0.96 | 59.37 | -4.3 | 2.94 |
| RedHills | B3 | 5/6/2020 | 10.6771 | 0.22 | 13.41 | -0.87 | 0.61 |
| RedHills | B3 | 6/11/2020 | 11.132 | 0.99 | 12.87 | -0.98 | 1.03 |
| RedHills | B3 | 7/27/2020 | 5.95784 | 0.47 | 6.39 | -0.81 | 1 |
| RedHills | B3 | 9/22/2020 | 21.5415 | 0.88 | 32.07 | -1.64 | 1.24 |
| RedHills | B3 | 11/5/2020 | 3.12081 | 0.9 | 4.36 | -1.11 | 0.62 |
| RedHills | B3 | 12/8/2020 | 2.30568 | 0.97 | 10.14 | -7.24 | 5.73 |
| RedHills | B3 | 4/19/2021 | 1.83219 | 0.93 | 2.05 | -0.53 | 0.47 |
| RedHills | B3 | 5/24/2021 | 5.19558 | 0.94 | 3.8 | 0.22 | 0.54 |
| RedHills | B3 | 7/8/2021 | 18.6694 | 0.92 | 30.37 | -2.25 | 1.87 |
| RedHills | B3 | 8/11/2021 | 4.22115 | 0.96 | 3.8 | 1.65 | -2.24 |
| RedHills | B3 | 9/9/2021 | 1.5314 | 0.92 | 2.84 | -2.58 | 1.92 |
| RedHills | B3 | 12/3/2021 | 24.647 | 1 | 127.92 | -7.35 | 4.97 |
| RedHills | B3 | 5/17/2022 | 8.49781 | 0.39 | 10.3 | -0.96 | 0.86 |
| RedHills | B3 | 7/2/2022 | 5.79153 | 0.73 | 11.19 | -3.39 | 3 |
| RedHills | B3 | 8/25/2022 | 8.94331 | 0.96 | 40.77 | -7.66 | 6.23 |
| RedHills | B3 | 10/20/2022 | 2.48337 | 0.97 | 11.34 | -7.8 | 6.43 |
| RedHills | C1 | 8/13/2019 | 23.2941 | 1 | 86.85 | -5.66 | 3.95 |
| RedHills | C1 | 10/16/2019 | 18.9416 | 0.99 | 43.05 | -3.08 | 1.95 |
| RedHills | C1 | 11/20/2019 | 11.7526 | 0.79 | 40.45 | -6.37 | 5.43 |
| RedHills | C1 | 1/8/2020 | 1.93028 | 0.99 | 6.82 | -4.68 | 2.52 |
| RedHills | C1 | 2/26/2020 | 24.3882 | 0.99 | 79.79 | -4.02 | 1.77 |
| RedHills | C1 | 5/6/2020 | 12.3747 | 0.87 | 17.71 | -1.24 | 0.75 |
| RedHills | C1 | 6/11/2020 | 9.42467 | 0.58 | 8.58 | 0.64 | -0.69 |
| RedHills | C1 | 7/27/2020 | 5.71285 | 0.96 | 9.27 | -2.36 | 2.04 |
| RedHills | C1 | 9/22/2020 | 24.1363 | 0.99 | 28.21 | 0.32 | NA |
| RedHills | C1 | 11/5/2020 | 4.05455 | 1 | 4.54 | 0.22 | -0.7 |
| RedHills | C1 | 12/8/2020 | 2.91613 | 0.63 | 5.73 | -2.86 | 2.15 |
| RedHills | C1 | 4/19/2021 | 2.17907 | 0.49 | 2.38 | -0.61 | 0.65 |
| RedHills | C1 | 5/24/2021 | 8.02287 | 0.87 | 5.47 | 1.62 | -1.31 |
| RedHills | C1 | 7/8/2021 | 23.4298 | 0.85 | 32.77 | -1.43 | 1.12 |
| RedHills | C1 | 8/11/2021 | 5.93247 | 0.98 | 8.76 | -1.26 | 0.67 |
| RedHills | C1 | 9/9/2021 | 0.973427 | 0.94 | 2.87 | -5.99 | 5.41 |
| RedHills | C1 | 12/3/2021 | 16.6561 | 1 | 34.99 | -3.1 | 2.28 |
| RedHills | C1 | 3/16/2022 | 2.25142 | 0.99 | 1.12 | 2.46 | -1.68 |
| RedHills | C1 | 5/17/2022 | 3.34251 | 0.98 | 5.63 | -2.43 | 2.02 |
| RedHills | C1 | 7/2/2022 | 6.62113 | 1 | 14.74 | -3.17 | 2.18 |
| RedHills | C1 | 8/25/2022 | 6.33613 | 0.93 | 15.74 | 2.21 | NA |
| RedHills | C1 | 10/20/2022 | 2.05908 | 0.95 | 6.27 | -5.35 | 4.36 |
| RedHills | C2 | 8/13/2019 | 33.7105 | 1 | 144.71 | -5.45 | 2.7 |
| RedHills | C2 | 9/9/2019 | 36.4628 | 1 | 105.84 | 2.71 | NA |
| RedHills | C2 | 10/16/2019 | 24.3847 | 1 | 56.29 | -2.26 | 0.48 |
| RedHills | C2 | 11/20/2019 | 10.0537 | 0.57 | 19.8 | -2.64 | 1.81 |
| RedHills | C2 | 1/8/2020 | 3.82942 | 0.3 | 5.24 | -0.36 | -0.49 |
| RedHills | C2 | 2/26/2020 | 24.3993 | 0.99 | 71.71 | -3.41 | 1.27 |
| RedHills | C2 | 5/6/2020 | 13.8495 | 0.88 | 26.49 | 1.48 | NA |
| RedHills | C2 | 6/11/2020 | 14.0905 | 0.95 | 21.67 | -2.01 | 1.69 |
| RedHills | C2 | 7/27/2020 | 9.10454 | 0.93 | 17.21 | -2.39 | 1.56 |
| RedHills | C2 | 9/22/2020 | 27.5012 | 0.91 | 53.12 | -2.71 | 1.98 |
| RedHills | C2 | 11/5/2020 | 4.81846 | 1 | 16.03 | -5.41 | 4.08 |
| RedHills | C2 | 12/8/2020 | 2.97235 | 0.98 | 9.66 | -4.94 | 3.42 |
| RedHills | C2 | 4/19/2021 | 2.8619 | 0.99 | 4.1 | -1.04 | 0.44 |
| RedHills | C2 | 5/24/2021 | 16.5519 | 0.96 | 16.42 | 0.67 | -1.01 |
| RedHills | C2 | 7/8/2021 | 34.6157 | 0.97 | 62.35 | -2.25 | 1.52 |
| RedHills | C2 | 8/11/2021 | 7.95534 | 0.97 | 15.71 | -3.43 | 3 |
| RedHills | C2 | 9/9/2021 | 1.11345 | 0.98 | 1.58 | -1.3 | 0.89 |
| RedHills | C2 | 12/3/2021 | 23.0637 | 0.98 | 88.1 | -6.02 | 4.43 |
| RedHills | C2 | 3/16/2022 | 2.51344 | 0.24 | 2.18 | 0.42 | -0.22 |
| RedHills | C2 | 5/17/2022 | 3.64206 | 1 | 5.04 | -0.92 | 0.37 |
| RedHills | C2 | 7/2/2022 | 7.13326 | 0.99 | 12.8 | 1.31 | NA |
| RedHills | C2 | 8/25/2022 | 9.38714 | 0.7 | 20.46 | 1.83 | NA |
| RedHills | C2 | 10/20/2022 | 2.55844 | 0.94 | 7.54 | 2.76 | NA |
| RedHills | C3 | 8/13/2019 | 50.1397 | 1 | 239.95 | 4.74 | NA |
| RedHills | C3 | 9/9/2019 | 31.2537 | 0.92 | 108.51 | 3.35 | NA |
| RedHills | C3 | 10/16/2019 | 20.6153 | 0.97 | 69.55 | -5.06 | 3.44 |
| RedHills | C3 | 11/20/2019 | 11.0138 | 1 | 86.12 | -11.14 | 8.8 |
| RedHills | C3 | 1/8/2020 | 2.86953 | 0.98 | 9.03 | -4.07 | 2.08 |
| RedHills | C3 | 2/26/2020 | 24.882 | 1 | 84.22 | -5.04 | 3.39 |
| RedHills | C3 | 5/6/2020 | 14.6923 | 0.99 | 25.82 | -1.89 | 1.03 |
| RedHills | C3 | 6/11/2020 | 12.3771 | 0.77 | 16.31 | 0.58 | NA |
| RedHills | C3 | 7/27/2020 | 8.58909 | 0.95 | 11.61 | 0.64 | NA |
| RedHills | C3 | 9/22/2020 | 26.4988 | 0.93 | 56.13 | -2.76 | 1.71 |
| RedHills | C3 | 11/5/2020 | 4.89214 | 0.99 | 10.82 | -2.94 | 1.83 |
| RedHills | C3 | 12/8/2020 | 2.91598 | 0.98 | 10.83 | -6.45 | 5.24 |
| RedHills | C3 | 4/19/2021 | 2.8683 | 0.66 | 3.77 | -1.06 | 0.76 |
| RedHills | C3 | 5/24/2021 | 13.7717 | 0.3 | 13.36 | 0.47 | -0.63 |
| RedHills | C3 | 7/8/2021 | 35.9969 | 0.99 | 67.31 | -2.36 | 1.55 |
| RedHills | C3 | 8/11/2021 | 6.73877 | 0.99 | 11.53 | -2 | 1.31 |
| RedHills | C3 | 9/9/2021 | 1.59924 | 0.89 | 1.8 | 1.52 | -2.91 |
| RedHills | C3 | 12/3/2021 | 23.9999 | 0.99 | 84.11 | -5.29 | 3.64 |
| RedHills | C3 | 3/16/2022 | 2.24382 | 0.97 | 1.56 | 0.6 | 0.13 |
| RedHills | C3 | 5/17/2022 | 3.58207 | 0.94 | 5.54 | -1.74 | 1.26 |
| RedHills | C3 | 7/2/2022 | 11.4491 | 0.99 | 39.34 | -5.44 | 3.99 |
| RedHills | C3 | 10/20/2022 | 4.03811 | 0.97 | 18.51 | -7.11 | 5.31 |
| RedHills | D1 | 8/13/2019 | 44.8208 | 1 | 212.84 | -6.32 | 3.65 |
| RedHills | D1 | 10/16/2019 | 25.3544 | 0.94 | 99.32 | 3.83 | NA |
| RedHills | D1 | 11/20/2019 | 12.0003 | 0.86 | 38.45 | -4.41 | 2.58 |
| RedHills | D1 | 1/8/2020 | 2.90653 | 0.98 | 6.99 | -1.99 | -0.23 |
| RedHills | D1 | 2/26/2020 | 32.2879 | 0.98 | 72.95 | -1.77 | -0.3 |
| RedHills | D1 | 5/6/2020 | 17.3224 | 0.92 | 34.23 | -2.72 | 1.91 |
| RedHills | D1 | 6/11/2020 | 17.8659 | 0.93 | 24.69 | -1.54 | 1.33 |
| RedHills | D1 | 7/27/2020 | 10.0028 | 0.64 | 13.31 | -1.32 | 1.1 |
| RedHills | D1 | 9/22/2020 | 26.2163 | 1 | 46.05 | -2.71 | 2.31 |
| RedHills | D1 | 11/5/2020 | 6.3417 | 0.89 | 11.45 | -2.21 | 1.45 |
| RedHills | D1 | 12/8/2020 | 4.6445 | 0.97 | 11.59 | -5.57 | 5.34 |
| RedHills | D1 | 4/19/2021 | 2.65835 | 0.89 | 3.06 | -1 | 1.07 |
| RedHills | D1 | 5/24/2021 | 8.05473 | 0.84 | 5.09 | 1.73 | -1.25 |
| RedHills | D1 | 7/8/2021 | 24.5068 | 0.96 | 31.53 | -0.85 | 0.5 |
| RedHills | D1 | 8/11/2021 | 6.96319 | 0.98 | 10.38 | -1.34 | 0.77 |
| RedHills | D1 | 9/9/2021 | 1.87491 | 0.72 | 3.41 | -2.63 | 2.07 |
| RedHills | D1 | 12/3/2021 | 37.095 | 1 | 80.09 | -3.18 | 2.31 |
| RedHills | D1 | 3/16/2022 | 2.34308 | 1 | 2.47 | 0.63 | -1.15 |
| RedHills | D1 | 5/17/2022 | 4.95114 | 0.76 | 6.25 | 0.48 | NA |
| RedHills | D1 | 7/2/2022 | 6.31784 | 0.93 | 25.99 | -5.23 | 2.59 |
| RedHills | D1 | 8/25/2022 | 8.68783 | 0.86 | 21.18 | 2.16 | NA |
| RedHills | D1 | 10/20/2022 | 2.89077 | 0.95 | 6.56 | -3.38 | 2.42 |
| RedHills | D2 | 8/13/2019 | 52.9942 | 1 | 274.48 | -6.65 | 3.62 |
| RedHills | D2 | 9/9/2019 | 37.1781 | 0.73 | 78.33 | 1.74 | NA |
| RedHills | D2 | 10/16/2019 | 25.7378 | 1 | 72.2 | 2.6 | NA |
| RedHills | D2 | 11/20/2019 | 13.4134 | 1 | 49.33 | -4.62 | 2.17 |
| RedHills | D2 | 1/8/2020 | 8.79284 | 0.89 | 13.7 | -5.21 | 6.03 |
| RedHills | D2 | 2/26/2020 | 39.8097 | 1 | 106.4 | -2.88 | 0.84 |
| RedHills | D2 | 5/6/2020 | 20.6699 | 1 | 40.08 | 1.51 | NA |
| RedHills | D2 | 6/11/2020 | 21.1855 | 0.98 | 27.96 | -0.65 | 0.1 |
| RedHills | D2 | 7/27/2020 | 11.9724 | 0.83 | 25.33 | 1.75 | NA |
| RedHills | D2 | 9/22/2020 | 41.4805 | 0.97 | 85.8 | -2.92 | 2.06 |
| RedHills | D2 | 11/5/2020 | 7.73009 | 0.97 | 17.18 | -2.76 | 1.51 |
| RedHills | D2 | 12/8/2020 | 5.35528 | 1 | 25.66 | -7.99 | 6.51 |
| RedHills | D2 | 4/19/2021 | 3.71567 | 0.97 | 8.31 | -3.48 | 2.64 |
| RedHills | D2 | 5/24/2021 | 9.14091 | 0.72 | 9.89 | -0.05 | -0.17 |
| RedHills | D2 | 7/8/2021 | 31.5901 | 0.92 | 66.86 | -3.25 | 2.49 |
| RedHills | D2 | 9/9/2021 | 2.14623 | 0.92 | 8.84 | -6.64 | 5.08 |
| RedHills | D2 | 12/3/2021 | 38.3238 | 0.98 | 149.16 | 3.81 | NA |
| RedHills | D2 | 3/16/2022 | 3.59765 | 0.19 | 2.68 | 1.48 | -1.35 |
| RedHills | D2 | 5/17/2022 | 6.18379 | 1 | 10.63 | -1.68 | 0.78 |
| RedHills | D2 | 7/2/2022 | 12.0627 | 0.91 | 30.9 | -2.21 | -0.18 |
| RedHills | D2 | 8/25/2022 | 14.9907 | 0.96 | 52.8 | 3.41 | NA |
| RedHills | D2 | 10/20/2022 | 5.37115 | 0.99 | 18.13 | 3.24 | NA |
| RedHills | D3 | 8/13/2019 | 45.2634 | 0.99 | 213.7 | 4.68 | NA |
| RedHills | D3 | 10/16/2019 | 27.5565 | 0.94 | 72.1 | 2.37 | NA |
| RedHills | D3 | 1/8/2020 | 4.3255 | 0.98 | 1.93 | 17.6 | -37.44 |
| RedHills | D3 | 2/26/2020 | 32.7609 | 0.99 | 78.08 | -2.31 | 0.4 |
| RedHills | D3 | 5/6/2020 | 20.5301 | 0.98 | 34.05 | -1.12 | 0.02 |
| RedHills | D3 | 6/11/2020 | 21.8435 | 0.98 | 21.81 | 0.95 | -1.47 |
| RedHills | D3 | 7/27/2020 | 12.1112 | 1 | 23.33 | -1.78 | 0.49 |
| RedHills | D3 | 9/22/2020 | 27.2765 | 0.94 | 54.14 | -0.37 | -2.25 |
| RedHills | D3 | 11/5/2020 | 8.06801 | 0.98 | 11.95 | -0.57 | -0.46 |
| RedHills | D3 | 12/8/2020 | 5.58047 | 0.96 | 14.42 | -4.08 | 3.02 |
| RedHills | D3 | 4/19/2021 | 3.64211 | 0.98 | 6.8 | -1.46 | 0.08 |
| RedHills | D3 | 5/24/2021 | 8.98016 | 0.85 | 7.81 | 1.4 | -1.72 |
| RedHills | D3 | 7/8/2021 | 33.0868 | 0.96 | 62.48 | -2.31 | 1.43 |
| RedHills | D3 | 8/11/2021 | 10.0757 | 0.99 | 11.02 | 0.55 | -1.15 |
| RedHills | D3 | 9/9/2021 | 2.627 | 0.31 | 2.99 | -0.35 | 0.14 |
| RedHills | D3 | 12/3/2021 | 41.3484 | 0.99 | 105.59 | -2.84 | 1 |
| RedHills | D3 | 3/16/2022 | 3.96526 | 0.65 | 2.61 | 2.31 | -2.25 |
| RedHills | D3 | 5/17/2022 | 5.47692 | 1 | 8.16 | -0.17 | -1.15 |
| RedHills | D3 | 7/2/2022 | 8.30074 | 1 | 27.11 | -3.15 | 0.05 |
| RedHills | D3 | 8/25/2022 | 12.3606 | 0.97 | 29.97 | 2.14 | NA |
| RedHills | D3 | 10/20/2022 | 4.76453 | 0.98 | 14.71 | -4.5 | 2.93 |
| RedHills | E1 | 8/13/2019 | 44.6654 | 1 | 245.4 | -7.22 | 4.29 |
| RedHills | E1 | 9/9/2019 | 36.5549 | 0.95 | 82.83 | -3.01 | 1.85 |
| RedHills | E1 | 10/16/2019 | 20.135 | 0.92 | 39.64 | -1.54 | -0.03 |
| RedHills | E1 | 11/20/2019 | 6.6039 | 1 | 27.27 | -7.05 | 5.72 |
| RedHills | E1 | 1/8/2020 | 6.02823 | 1 | 61.27 | -13.16 | 10.12 |
| RedHills | E1 | 2/26/2020 | 24.0246 | 1 | 70.53 | -4.01 | 2.34 |
| RedHills | E1 | 5/6/2020 | 12.3412 | 0.98 | 18.06 | -0.76 | -0.09 |
| RedHills | E1 | 6/11/2020 | 12.8867 | 0.51 | 14.53 | -0.41 | 0.25 |
| RedHills | E1 | 7/27/2020 | 8.00153 | 1 | 12.53 | -2.3 | 2.05 |
| RedHills | E1 | 9/22/2020 | 22.75 | 1 | 36.25 | -1.71 | 1.1 |
| RedHills | E1 | 11/5/2020 | 3.62278 | 0.94 | 4.6 | -0.68 | 0.29 |
| RedHills | E1 | 12/8/2020 | 1.91064 | 0.98 | 5.39 | -4.73 | 3.7 |
| RedHills | E1 | 4/19/2021 | 1.77283 | 0.7 | 2.28 | -1.04 | 0.79 |
| RedHills | E1 | 5/24/2021 | 6.2321 | 0.8 | 4.43 | 1.56 | -1.34 |
| RedHills | E1 | 7/8/2021 | 15.9541 | 0.07 | 17.18 | -0.31 | 0.24 |
| RedHills | E1 | 8/11/2021 | 6.71508 | 0.2 | 6.78 | 0.36 | -0.57 |
| RedHills | E1 | 9/9/2021 | 1.30411 | 0.77 | 2.87 | -2.54 | 1.19 |
| RedHills | E1 | 12/3/2021 | 22.909 | 1 | 71.63 | -4.55 | 2.96 |
| RedHills | E1 | 3/16/2022 | 2.40147 | 0.77 | 1.46 | 0.93 | 0 |
| RedHills | E1 | 5/17/2022 | 3.73096 | 0.98 | 4.91 | -0.79 | 0.34 |
| RedHills | E1 | 7/2/2022 | 8.79673 | 0.98 | 13.15 | -0.92 | 0.09 |
| RedHills | E1 | 8/25/2022 | 9.79733 | 0.97 | 29.42 | -4.82 | 3.59 |
| RedHills | E1 | 10/20/2022 | 2.79295 | 0.99 | 7.32 | -3.56 | 2.12 |
| RedHills | E2 | 8/13/2019 | 54.0104 | 1 | 319.61 | -7.83 | 4.86 |
| RedHills | E2 | 9/9/2019 | 43.069 | 0.97 | 159.84 | 3.61 | NA |
| RedHills | E2 | 11/20/2019 | 10.1615 | 1 | 48.28 | -7.24 | 5.33 |
| RedHills | E2 | 1/8/2020 | 48.9946 | 1 | 421.26 | 4.44 | -99.65 |
| RedHills | E2 | 2/26/2020 | 30.6013 | 1 | 89.49 | -4.07 | 2.46 |
| RedHills | E2 | 5/6/2020 | 17.6049 | 1 | 29.57 | -1.72 | 0.94 |
| RedHills | E2 | 6/11/2020 | 17.5557 | 0.81 | 30.15 | -3.49 | 3.51 |
| RedHills | E2 | 7/27/2020 | 9.48258 | 0.92 | 18.75 | -3.53 | 3.14 |
| RedHills | E2 | 9/22/2020 | 29.6953 | 0.98 | 63.02 | -3.63 | 3.05 |
| RedHills | E2 | 11/5/2020 | 4.67096 | 0.99 | 14.82 | -5.63 | 4.62 |
| RedHills | E2 | 12/8/2020 | 2.75637 | 0.98 | 16.14 | -10.2 | 8.95 |
| RedHills | E2 | 4/19/2021 | 2.73441 | 0.97 | 8.88 | -6.18 | 5.36 |
| RedHills | E2 | 5/24/2021 | 7.4431 | 0.99 | 5.4 | 0.4 | 0.3 |
| RedHills | E2 | 7/8/2021 | 21.0639 | 0.93 | 60.96 | -6.13 | 5.68 |
| RedHills | E2 | 8/11/2021 | 7.766 | 0.93 | 9.34 | 0.38 | NA |
| RedHills | E2 | 9/9/2021 | 2.82672 | 0.99 | 4.03 | -3.35 | 3.81 |
| RedHills | E2 | 12/3/2021 | 35.0674 | 0.99 | 161.5 | -7.64 | 6.15 |
| RedHills | E2 | 3/16/2022 | 2.4692 | 0.19 | 2.66 | -1 | 1.25 |
| RedHills | E2 | 5/17/2022 | 5.02712 | 0.95 | 11.41 | -4.17 | 3.63 |
| RedHills | E2 | 7/2/2022 | 10.4357 | 0.96 | 20.68 | -2.75 | 1.95 |
| RedHills | E2 | 8/25/2022 | 13.258 | 0.99 | 56.64 | -7.15 | 5.72 |
| RedHills | E2 | 10/20/2022 | 3.63246 | 0.99 | 23.17 | -9.49 | 7.38 |
| RedHills | E3 | 8/13/2019 | 42.0337 | 1 | 204.12 | -6.26 | 3.37 |
| RedHills | E3 | 9/9/2019 | 38.9568 | 0.98 | 57.53 | -0.88 | 0.08 |
| RedHills | E3 | 11/20/2019 | 4.94306 | 0.55 | 10.71 | 1.81 | NA |
| RedHills | E3 | 1/8/2020 | 6.41332 | 0.9 | 23.52 | -4.97 | 2.84 |
| RedHills | E3 | 2/26/2020 | 23.277 | 1 | 66.82 | -3.63 | 1.8 |
| RedHills | E3 | 5/6/2020 | 12.6525 | 0.94 | 18.52 | -1.07 | 0.4 |
| RedHills | E3 | 6/11/2020 | 11.9443 | 0.96 | 10.36 | 1.13 | -1.29 |
| RedHills | E3 | 7/27/2020 | 6.50895 | 0.69 | 8.68 | -1.21 | 0.93 |
| RedHills | E3 | 9/22/2020 | 21.7075 | 0.97 | 26.4 | 0.4 | NA |
| RedHills | E3 | 11/5/2020 | 4.98448 | 0.91 | 16.75 | -5.88 | 4.77 |
| RedHills | E3 | 12/8/2020 | 3.41185 | 0.98 | 4.34 | 0.87 | -2.27 |
| RedHills | E3 | 4/19/2021 | 1.75624 | 0.77 | 1.3 | 1.84 | -1.88 |
| RedHills | E3 | 5/24/2021 | 5.9768 | 0.78 | 4.94 | 0.71 | -0.5 |
| RedHills | E3 | 7/8/2021 | 17.1558 | 0.97 | 21.72 | -0.46 | -0.05 |
| RedHills | E3 | 8/11/2021 | 5.82213 | 0.72 | 8.86 | -1.67 | 1.2 |
| RedHills | E3 | 9/9/2021 | 1.68322 | 0.3 | 1.94 | -0.96 | 1 |
| RedHills | E3 | 12/3/2021 | 19.3537 | 0.99 | 51.69 | -3.66 | 2.2 |
| RedHills | E3 | 3/16/2022 | 2.60104 | 1 | 0.96 | 3.62 | -2.6 |
| RedHills | E3 | 5/17/2022 | 3.31228 | 0.66 | 3.02 | 0.93 | -1.14 |
| RedHills | E3 | 7/2/2022 | 6.32216 | 1 | 8.65 | -1.19 | 0.82 |
| RedHills | E3 | 10/20/2022 | 2.05614 | 0.98 | 2.72 | 0.59 | NA |
| RedHills | F1 | 8/13/2019 | 33.9568 | 1 | 150.29 | -5.92 | 3.39 |
| RedHills | F1 | 9/9/2019 | 22.7792 | 0.96 | 55.78 | 2.17 | NA |
| RedHills | F1 | 10/16/2019 | 21.9692 | 0.96 | 47.63 | -1.99 | 0.32 |
| RedHills | F1 | 11/20/2019 | 6.36051 | 0.96 | 20.32 | -5.22 | 3.95 |
| RedHills | F1 | 1/8/2020 | 2.80951 | 1 | 8.23 | -4.25 | 2.76 |
| RedHills | F1 | 2/26/2020 | 23.0231 | 0.46 | 15.13 | 4.47 | -5.86 |
| RedHills | F1 | 5/6/2020 | 13.571 | 0.98 | 17.62 | -0.92 | 0.59 |
| RedHills | F1 | 6/11/2020 | 11.8345 | 0.95 | 9.9 | 0.44 | -0.13 |
| RedHills | F1 | 7/27/2020 | 7.348 | 0.35 | 7.07 | 0.16 | -0.12 |
| RedHills | F1 | 9/22/2020 | 22.0387 | 0.87 | 22.88 | -0.07 | -0.02 |
| RedHills | F1 | 11/5/2020 | 2.67657 | 0.94 | 2.02 | 1.49 | -1.41 |
| RedHills | F1 | 12/8/2020 | 1.76739 | 0.76 | 3.37 | -3.45 | 3.13 |
| RedHills | F1 | 4/19/2021 | 2.05937 | 0.8 | 1.45 | 1.26 | -0.87 |
| RedHills | F1 | 5/24/2021 | 6.26513 | 0.94 | 2.79 | 2.32 | -1.22 |
| RedHills | F1 | 7/8/2021 | 24.1765 | 0.74 | 28.32 | -0.44 | 0.18 |
| RedHills | F1 | 8/11/2021 | 6.31039 | 0.39 | 6.83 | 0.16 | NA |
| RedHills | F1 | 9/9/2021 | 0.815884 | 0.78 | 0.56 | 1.79 | -1.58 |
| RedHills | F1 | 12/3/2021 | 19.7709 | 1 | 29.9 | -1.64 | 1.17 |
| RedHills | F1 | 3/16/2022 | 2.2675 | 0.98 | 0.98 | 3.45 | -2.77 |
| RedHills | F1 | 5/17/2022 | 4.04649 | 0.31 | 4.04 | -0.02 | 0.04 |
| RedHills | F1 | 7/2/2022 | 6.47603 | 0.81 | 4.83 | 1.04 | -0.69 |
| RedHills | F1 | 8/25/2022 | 6.29517 | 0.68 | 8.65 | -1.42 | 1.15 |
| RedHills | F1 | 10/20/2022 | 1.63089 | 0.84 | 3.97 | -4.76 | 4.26 |
| RedHills | F2 | 8/13/2019 | 27.3798 | 1 | 124.51 | -6.36 | 4.04 |
| RedHills | F2 | 9/9/2019 | 26.0552 | 0.94 | 72.39 | -3.45 | 1.64 |
| RedHills | F2 | 10/16/2019 | 20.8928 | 1 | 35.58 | -2.12 | 1.51 |
| RedHills | F2 | 11/20/2019 | 5.44021 | 0.98 | 17.68 | -4.52 | 2.71 |
| RedHills | F2 | 1/8/2020 | 2.87369 | 0.99 | 5.11 | -1.49 | 0.33 |
| RedHills | F2 | 2/26/2020 | 26.1722 | 0.98 | 68.33 | -2.68 | 0.6 |
| RedHills | F2 | 5/6/2020 | 10.7771 | 0.99 | 13.68 | -0.16 | -0.53 |
| RedHills | F2 | 6/11/2020 | 8.27192 | 0.58 | 7.55 | -0.06 | 0.36 |
| RedHills | F2 | 7/27/2020 | 6.38798 | 0.96 | 6.45 | 0.19 | -0.32 |
| RedHills | F2 | 9/22/2020 | 18.0622 | 1 | 18.86 | 0.78 | -1.36 |
| RedHills | F2 | 11/5/2020 | 2.43057 | 0.87 | 1.6 | 1.99 | -1.77 |
| RedHills | F2 | 12/8/2020 | 1.90054 | 0.91 | 3.1 | -1.98 | 1.44 |
| RedHills | F2 | 4/19/2021 | 2.48012 | 1 | 2.45 | 0.99 | -1.5 |
| RedHills | F2 | 5/24/2021 | 7.20733 | 0.97 | 3.36 | 3.38 | -2.88 |
| RedHills | F2 | 7/8/2021 | 25.6363 | 0.95 | 23.07 | 0.79 | -0.87 |
| RedHills | F2 | 8/11/2021 | 5.47167 | 0.95 | 4.46 | 1.56 | -1.75 |
| RedHills | F2 | 9/9/2021 | 1.05923 | 0.25 | 1.17 | 0.57 | -1.21 |
| RedHills | F2 | 12/3/2021 | 17.888 | 0.95 | 26.27 | -0.94 | 0.19 |
| RedHills | F2 | 3/16/2022 | 1.88976 | 0.98 | 3.17 | -1.36 | 0.36 |
| RedHills | F2 | 5/17/2022 | 3.47699 | 1 | 4.47 | 0.53 | NA |
| RedHills | F2 | 7/2/2022 | 6.5647 | 0.67 | 6.64 | 0.4 | -0.64 |
| RedHills | F2 | 8/25/2022 | 6.27686 | 0.97 | 9.64 | -1.25 | 0.52 |
| RedHills | F2 | 10/20/2022 | 2.68925 | 0.94 | 11.73 | -7.61 | 6.36 |
| RedHills | F3 | 8/13/2019 | 33.4934 | 1 | 163.1 | -6.45 | 3.71 |
| RedHills | F3 | 9/9/2019 | 28.5715 | 0.89 | 76.51 | -3.83 | 2.47 |
| RedHills | F3 | 10/16/2019 | 19.5868 | 1 | 35.01 | -2.44 | 1.83 |
| RedHills | F3 | 11/20/2019 | 6.96354 | 0.99 | 19.84 | -4.43 | 3.18 |
| RedHills | F3 | 1/8/2020 | 2.27487 | 1 | 5.28 | -2.54 | 0.95 |
| RedHills | F3 | 2/26/2020 | 28.241 | 0.96 | 68.89 | -2.76 | 1.08 |
| RedHills | F3 | 5/6/2020 | 12.8762 | 0.81 | 14.31 | -0.47 | 0.39 |
| RedHills | F3 | 6/11/2020 | 11.3511 | 0.99 | 8.65 | 0.51 | 0.01 |
| RedHills | F3 | 7/27/2020 | 7.6981 | 0.86 | 8.65 | -0.62 | 0.58 |
| RedHills | F3 | 9/22/2020 | 21.4259 | 0.99 | 35.49 | -2.56 | 2.28 |
| RedHills | F3 | 11/5/2020 | 3.69005 | 0.1 | 3.91 | 0.12 | NA |
| RedHills | F3 | 12/8/2020 | 2.13045 | 0.8 | 5.18 | -4.15 | 3.36 |
| RedHills | F3 | 4/19/2021 | 2.0463 | 0.99 | 1.89 | 0.06 | 0.13 |
| RedHills | F3 | 5/24/2021 | 8.05028 | 0.96 | 4.51 | 2.01 | -1.34 |
| RedHills | F3 | 7/8/2021 | 26.0338 | 0.83 | 30.89 | 0.35 | NA |
| RedHills | F3 | 8/11/2021 | 6.73762 | 0.28 | 6.84 | 0.17 | -0.3 |
| RedHills | F3 | 9/9/2021 | 1.45403 | 1 | 2.13 | -4.59 | 5.37 |
| RedHills | F3 | 12/3/2021 | 22.4393 | 0.99 | 58.64 | -4.05 | 2.94 |
| RedHills | F3 | 3/16/2022 | 2.62458 | 0.98 | 1.88 | 0.84 | -0.3 |
| RedHills | F3 | 7/2/2022 | 8.95158 | 0.82 | 20.33 | -4.13 | 3.57 |
| RedHills | F3 | 8/25/2022 | 7.06502 | 0.89 | 17.76 | 2.25 | NA |
| RedHills | F3 | 10/20/2022 | 3.05346 | 0.97 | 17.75 | -10.08 | 8.81 |
| RedHills | G1 | 8/13/2019 | 41.3891 | 1 | 165.07 | -4.9 | 2.15 |
| RedHills | G1 | 9/9/2019 | 54.6281 | 1 | 190.57 | -5 | 3.17 |
| RedHills | G1 | 10/16/2019 | 33.0193 | 0.97 | 205.82 | -9.66 | 7.81 |
| RedHills | G1 | 11/20/2019 | 10.6966 | 0.99 | 28.36 | -3.56 | 2.06 |
| RedHills | G1 | 1/8/2020 | 7.06597 | 1 | 12.6 | 6.69 | -20.96 |
| RedHills | G1 | 2/26/2020 | 43.9388 | 0.99 | 89.57 | -1.76 | 0.2 |
| RedHills | G1 | 5/6/2020 | 30.5175 | 0.95 | 48.36 | -0.88 | -0.21 |
| RedHills | G1 | 6/11/2020 | 37.7209 | 0.99 | 62.41 | 1.11 | NA |
| RedHills | G1 | 7/27/2020 | 11.573 | 0.75 | 13.74 | -0.36 | 0.02 |
| RedHills | G1 | 9/22/2020 | 39.475 | 0.97 | 51.96 | 0.58 | NA |
| RedHills | G1 | 11/5/2020 | 8.35412 | 0.02 | 8.69 | 0.08 | NA |
| RedHills | G1 | 12/8/2020 | 6.78483 | 0.93 | 10.74 | -0.24 | -1.3 |
| RedHills | G1 | 4/19/2021 | 4.10796 | 0.45 | 1.89 | 5.17 | -5.69 |
| RedHills | G1 | 5/24/2021 | 12.0653 | 0.72 | 9.9 | 0.89 | -0.75 |
| RedHills | G1 | 7/8/2021 | 35.8851 | 1 | 44.61 | -0.47 | 0.03 |
| RedHills | G1 | 8/11/2021 | 13.8972 | 0.61 | 10.64 | 2.08 | -2.37 |
| RedHills | G1 | 9/9/2021 | 3.55917 | 0.87 | 4.09 | -0.02 | -0.4 |
| RedHills | G1 | 12/3/2021 | 43.6546 | 0.78 | 53.02 | -0.07 | -0.52 |
| RedHills | G1 | 3/16/2022 | 5.16314 | 0.95 | 5.47 | 0.4 | -0.8 |
| RedHills | G1 | 5/17/2022 | 9.22455 | 0.98 | 13.12 | 0.75 | NA |
| RedHills | G1 | 7/2/2022 | 8.17088 | 0.58 | 11.25 | -1.79 | 1.7 |
| RedHills | G1 | 8/25/2022 | 11.4507 | 0.98 | 22.6 | -2.8 | 2.05 |
| RedHills | G1 | 10/20/2022 | 2.81081 | 1 | 7.22 | -3.99 | 2.9 |
| RedHills | G2 | 8/13/2019 | 46.3585 | 1 | 261.18 | -7.17 | 3.95 |
| RedHills | G2 | 9/9/2019 | 42.3793 | 0.97 | 169.81 | 3.93 | NA |
| RedHills | G2 | 10/16/2019 | 22.7145 | 0.88 | 136.15 | -9.92 | 8.43 |
| RedHills | G2 | 11/20/2019 | 10.1215 | 0.95 | 32.19 | -4.69 | 3.11 |
| RedHills | G2 | 1/8/2020 | 5.97379 | 0.77 | 0.02 | 26.07 | -25.78 |
| RedHills | G2 | 2/26/2020 | 33.7911 | 1 | 57.09 | -0.41 | -1.31 |
| RedHills | G2 | 5/6/2020 | 22.3444 | 0.98 | 60.78 | -3.49 | 1.82 |
| RedHills | G2 | 6/11/2020 | 23.1705 | 0.94 | 25.51 | 0.47 | -1.04 |
| RedHills | G2 | 7/27/2020 | 11.3025 | 0.93 | 18.3 | -0.79 | -0.45 |
| RedHills | G2 | 9/22/2020 | 28.4107 | 1 | 72.61 | -4.08 | 3.07 |
| RedHills | G2 | 11/5/2020 | 4.9266 | 0.95 | 6.15 | -0.2 | -0.41 |
| RedHills | G2 | 12/8/2020 | 4.91941 | 0.98 | 15.05 | -5.84 | 5.08 |
| RedHills | G2 | 4/19/2021 | 3.44596 | 0.94 | 5.31 | 0.94 | NA |
| RedHills | G2 | 5/24/2021 | 8.67321 | 0.8 | 7.35 | 1.12 | -1.19 |
| RedHills | G2 | 7/8/2021 | 27.8632 | 0.98 | 41.93 | -1.45 | 0.9 |
| RedHills | G2 | 8/11/2021 | 9.12423 | 0.92 | 13.42 | -1.16 | 0.52 |
| RedHills | G2 | 9/9/2021 | 1.78131 | 0.85 | 3.6 | -2.78 | 1.93 |
| RedHills | G2 | 12/3/2021 | 33.312 | 1 | 86.49 | -4.06 | 2.97 |
| RedHills | G2 | 3/16/2022 | 3.67507 | 0.87 | 4.8 | 0.56 | NA |
| RedHills | G2 | 5/17/2022 | 5.88597 | 0.99 | 10.26 | 1.24 | NA |
| RedHills | G2 | 7/2/2022 | 9.39065 | 0.8 | 12.1 | -0.05 | -0.76 |
| RedHills | G2 | 8/25/2022 | 11.5811 | 0.95 | 31.58 | -4.08 | 2.8 |
| RedHills | G2 | 10/20/2022 | 2.82525 | 0.99 | 6.52 | -3.52 | 2.58 |
| RedHills | G3 | 8/13/2019 | 47.1565 | 1 | 223.04 | -6.05 | 3.14 |
| RedHills | G3 | 9/9/2019 | 38.4998 | 0.97 | 78.2 | 1.64 | NA |
| RedHills | G3 | 10/16/2019 | 27.8553 | 0.98 | 58.65 | -2.51 | 1.34 |
| RedHills | G3 | 11/20/2019 | 8.15086 | 1 | 47.39 | -7.2 | 3.68 |
| RedHills | G3 | 1/8/2020 | 7.25917 | 0.99 | 92.94 | -16.06 | 12.99 |
| RedHills | G3 | 2/26/2020 | 52.4051 | 0.99 | 242.68 | -6.6 | 4.35 |
| RedHills | G3 | 5/6/2020 | 19.2411 | 0.97 | 29.77 | -0.83 | -0.19 |
| RedHills | G3 | 6/11/2020 | 19.2615 | 0.54 | 19.24 | 0.2 | -0.3 |
| RedHills | G3 | 7/27/2020 | 10.0597 | 0.73 | 13.1 | -0.08 | -0.76 |
| RedHills | G3 | 9/22/2020 | 30.5682 | 0.59 | 45.09 | -1.06 | 0.37 |
| RedHills | G3 | 11/5/2020 | 4.63773 | 0.98 | 3.23 | 2.3 | -2.42 |
| RedHills | G3 | 12/8/2020 | 2.41365 | 0.61 | 2.42 | -0.53 | 0.78 |
| RedHills | G3 | 4/19/2021 | 3.02947 | 1 | 3.98 | 0.58 | NA |
| RedHills | G3 | 5/24/2021 | 9.76422 | 0.01 | 9.51 | 0.21 | -0.23 |
| RedHills | G3 | 7/8/2021 | 24.288 | 0.8 | 33.42 | -1.14 | 0.72 |
| RedHills | G3 | 8/11/2021 | 9.59293 | 0.97 | 11.42 | 0.36 | NA |
| RedHills | G3 | 9/9/2021 | 5.00311 | 0.95 | 0.03 | 22.38 | -20.77 |
| RedHills | G3 | 12/3/2021 | 27.4818 | 0.95 | 55.68 | -2.51 | 1.49 |
| RedHills | G3 | 3/16/2022 | 4.99243 | 0.99 | 5.22 | 0.44 | -0.81 |
| RedHills | G3 | 5/17/2022 | 5.28471 | 0.8 | 6.96 | 0.58 | NA |
| RedHills | G3 | 7/2/2022 | 8.20071 | 0.61 | 11.62 | -1.23 | 0.76 |
| RedHills | G3 | 10/20/2022 | 3.58797 | 0.98 | 15 | -6.17 | 4.21 |
| RedHills | H1 | 8/13/2019 | 38.9737 | 1 | 229.69 | -7.89 | 5.02 |
| RedHills | H1 | 10/16/2019 | 20.6484 | 0.92 | 39.67 | 1.49 | NA |
| RedHills | H1 | 11/20/2019 | 7.80092 | 0.97 | 26.04 | -5.18 | 3.7 |
| RedHills | H1 | 1/8/2020 | 3.83249 | 0.42 | 3.01 | 2.84 | -3.71 |
| RedHills | H1 | 2/26/2020 | 41.3402 | 1 | 110.57 | -2.62 | 0.35 |
| RedHills | H1 | 5/6/2020 | 14.955 | 0.91 | 20.62 | 0.11 | -1.3 |
| RedHills | H1 | 6/11/2020 | 16.077 | 0.24 | 18.91 | 0.33 | NA |
| RedHills | H1 | 7/27/2020 | 7.91896 | 0.85 | 14.98 | -2.63 | 1.93 |
| RedHills | H1 | 9/22/2020 | 25.2889 | 0.82 | 39 | -1.16 | 0.36 |
| RedHills | H1 | 11/5/2020 | 4.08234 | 1 | 9.18 | -3 | 1.85 |
| RedHills | H1 | 12/8/2020 | 2.72029 | 0.96 | 5.72 | -4.65 | 4.56 |
| RedHills | H1 | 4/19/2021 | 2.18527 | 0.82 | 2.41 | 0.32 | -0.8 |
| RedHills | H1 | 5/24/2021 | 5.98017 | 1 | 4.02 | 1.16 | -0.59 |
| RedHills | H1 | 7/8/2021 | 21.7032 | 0.69 | 32.42 | -1.63 | 1.2 |
| RedHills | H1 | 8/11/2021 | 7.16769 | 0.9 | 9.16 | -0.81 | 0.46 |
| RedHills | H1 | 9/9/2021 | 1.27122 | 0.49 | 0.79 | 1.07 | -0.26 |
| RedHills | H1 | 12/3/2021 | 25.73 | 0.95 | 66.36 | -4.01 | 2.92 |
| RedHills | H1 | 3/16/2022 | 3.49385 | 0.93 | 2.83 | 2.49 | -3.25 |
| RedHills | H1 | 5/17/2022 | 4.36939 | 0.97 | 5.76 | -0.07 | -0.82 |
| RedHills | H1 | 7/2/2022 | 9.38478 | 1 | 25.64 | -4.17 | 2.94 |
| RedHills | H1 | 8/25/2022 | 9.9229 | 0.97 | 26.54 | -3.95 | 2.67 |
| RedHills | H1 | 10/20/2022 | 2.87059 | 1 | 10.31 | -5.65 | 4.11 |
| RedHills | H2 | 9/9/2019 | 42.8424 | 0.97 | 116.3 | 2.49 | NA |
| RedHills | H2 | 10/16/2019 | 24.1851 | 1 | 69.11 | -3.9 | 2.29 |
| RedHills | H2 | 11/20/2019 | 4.84063 | 0.3 | 3.04 | 3.67 | -4.29 |
| RedHills | H2 | 1/8/2020 | 2.04416 | 0.81 | 4.63 | 1.94 | NA |
| RedHills | H2 | 2/26/2020 | 29.4876 | 0.96 | 49.62 | 4.09 | -11.69 |
| RedHills | H2 | 5/6/2020 | 19.9933 | 1 | 39.88 | -2.11 | 0.89 |
| RedHills | H2 | 6/11/2020 | 18.979 | 0.92 | 20.36 | 0.38 | -0.8 |
| RedHills | H2 | 7/27/2020 | 8.41016 | 0.95 | 13.47 | -2.05 | 1.62 |
| RedHills | H2 | 9/22/2020 | 25.7192 | 1 | 49.42 | -1.6 | 0.19 |
| RedHills | H2 | 11/5/2020 | 4.6963 | 0.99 | 8.29 | -1.81 | 0.89 |
| RedHills | H2 | 12/8/2020 | 3.90853 | 0.89 | 10.12 | -4.48 | 3.64 |
| RedHills | H2 | 4/19/2021 | 2.94668 | 0.54 | 2.96 | 0.8 | -1.25 |
| RedHills | H2 | 5/24/2021 | 7.47195 | 0.23 | 7.26 | 0.38 | -0.49 |
| RedHills | H2 | 7/8/2021 | 24.6398 | 0.84 | 21.96 | 1.25 | -1.56 |
| RedHills | H2 | 8/11/2021 | 8.01529 | 1 | 9.47 | 0.51 | -1.36 |
| RedHills | H2 | 9/9/2021 | 1.6237 | 0.8 | 1.35 | -1.06 | 1.99 |
| RedHills | H2 | 12/3/2021 | 35.5029 | 1 | 50.77 | -0.71 | -0.09 |
| RedHills | H2 | 3/16/2022 | 4.07415 | 0.97 | 6.4 | -1.05 | 0.11 |
| RedHills | H2 | 5/17/2022 | 5.64979 | 0.97 | 8.45 | 0.87 | NA |
| RedHills | H2 | 7/2/2022 | 6.19091 | 0.95 | 6.94 | 0.03 | -0.41 |
| RedHills | H2 | 8/25/2022 | 7.90935 | 1 | 18.26 | -3.28 | 2.21 |
| RedHills | H2 | 10/20/2022 | 1.78761 | 0.99 | 4.23 | 2.07 | NA |
| RedHills | H3 | 8/13/2019 | 29.3803 | 0.98 | 79.12 | 2.46 | NA |
| RedHills | H3 | 9/9/2019 | 33.7317 | 0.59 | 41.68 | 0.18 | -0.98 |
| RedHills | H3 | 10/16/2019 | 19.3579 | 0.96 | 29.87 | -1.17 | 0.38 |
| RedHills | H3 | 11/20/2019 | 8.34831 | 0.73 | 7.9 | 1.93 | -2.9 |
| RedHills | H3 | 1/8/2020 | 1.6233 | 0.54 | 3.38 | -2.79 | 1.83 |
| RedHills | H3 | 2/26/2020 | 38.1674 | 0.99 | 91.36 | -2.17 | 0.13 |
| RedHills | H3 | 5/6/2020 | 16.5218 | 1 | 18.23 | 0.46 | -1.03 |
| RedHills | H3 | 6/11/2020 | 16.1152 | 0.97 | 12.21 | 1.51 | -1.45 |
| RedHills | H3 | 7/27/2020 | 8.51243 | 0.06 | 8.75 | 0.05 | NA |
| RedHills | H3 | 9/22/2020 | 23.1717 | 1 | 27.53 | 0.16 | -0.82 |
| RedHills | H3 | 11/5/2020 | 3.28676 | 0.91 | 2.7 | 1.36 | -1.47 |
| RedHills | H3 | 12/8/2020 | 2.01102 | 0.99 | 5.68 | -5.22 | 4.45 |
| RedHills | H3 | 4/19/2021 | 2.04555 | 0.78 | 1.48 | 1.36 | -1.09 |
| RedHills | H3 | 5/24/2021 | 6.47534 | 0.98 | 2.73 | 3.88 | -3.34 |
| RedHills | H3 | 7/8/2021 | 17.3783 | 0.5 | 15.08 | 0.85 | -0.86 |
| RedHills | H3 | 8/11/2021 | 6.82709 | 0.99 | 3.78 | 2.73 | -2.38 |
| RedHills | H3 | 9/9/2021 | 1.12561 | 0.74 | 0.77 | 2.17 | -2.15 |
| RedHills | H3 | 12/3/2021 | 24.9006 | 0.95 | 42.14 | -1.86 | 1.14 |
| RedHills | H3 | 3/16/2022 | 3.19049 | 0.9 | 2.16 | 2.46 | -2.56 |
| RedHills | H3 | 5/17/2022 | 4.58701 | 0.98 | 4.17 | 0.96 | -1.18 |
| RedHills | H3 | 7/2/2022 | 8.0645 | 0.98 | 14.42 | -2.5 | 1.93 |
| RedHills | H3 | 8/25/2022 | 8.4164 | 0.94 | 15.22 | -1.47 | 0.24 |
| RedHills | I1 | 8/13/2019 | 44.1539 | 1 | 246.92 | -7.05 | 3.75 |
| RedHills | I1 | 9/9/2019 | 56.2033 | 1 | 135.03 | -2.72 | 1.1 |
| RedHills | I1 | 10/16/2019 | 20.2411 | 1 | 51.13 | -3.09 | 1.49 |
| RedHills | I1 | 11/20/2019 | 8.57208 | 0.99 | 25.64 | -4.29 | 2.73 |
| RedHills | I1 | 1/8/2020 | 3.97251 | 0.99 | 13.12 | -4.64 | 2.83 |
| RedHills | I1 | 2/26/2020 | 37.4131 | 0.99 | 150.1 | -5.5 | 3.26 |
| RedHills | I1 | 5/6/2020 | 22.7948 | 1 | 27.18 | 0.24 | -0.96 |
| RedHills | I1 | 6/11/2020 | 24.6992 | 1 | 22.39 | 1.09 | -1.37 |
| RedHills | I1 | 7/27/2020 | 10.9751 | 0.7 | 18.07 | -3.01 | 2.94 |
| RedHills | I1 | 9/22/2020 | 31.6162 | 0.96 | 43.4 | -0.67 | 0 |
| RedHills | I1 | 11/5/2020 | 5.70658 | 0.44 | 5.75 | 0.68 | -1.06 |
| RedHills | I1 | 12/8/2020 | 5.96072 | 0.93 | 14.69 | -6.49 | 6.63 |
| RedHills | I1 | 4/19/2021 | 4.33589 | 0.99 | 5.24 | 0.35 | -1.18 |
| RedHills | I1 | 5/24/2021 | 11.2968 | 0.86 | 7.51 | 1.93 | -1.7 |
| RedHills | I1 | 7/8/2021 | 39.3456 | 0.91 | 45.93 | -0.12 | -0.31 |
| RedHills | I1 | 8/11/2021 | 10.701 | 0.82 | 12.98 | -0.65 | 0.39 |
| RedHills | I1 | 9/9/2021 | 1.7824 | 0.28 | 2.32 | -1.32 | 1.18 |
| RedHills | I1 | 12/3/2021 | 36.0538 | 0.94 | 70.39 | -2.56 | 1.71 |
| RedHills | I1 | 3/16/2022 | 4.31079 | 0.84 | 3.79 | 1.39 | -1.75 |
| RedHills | I1 | 5/17/2022 | 6.53442 | 0.91 | 8.55 | -0.27 | -0.47 |
| RedHills | I1 | 7/2/2022 | 8.40623 | 1 | 10.73 | -0.65 | 0.23 |
| RedHills | I1 | 8/25/2022 | 9.44736 | 0.94 | 24.58 | -3.95 | 2.8 |
| RedHills | I1 | 10/20/2022 | 3.02882 | 0.97 | 11.79 | -6.6 | 5.28 |
| RedHills | I2 | 9/9/2019 | 38.4127 | 0.98 | 93.76 | 2.16 | NA |
| RedHills | I2 | 10/16/2019 | 15.8017 | 0.94 | 37.76 | -2.15 | 0.1 |
| RedHills | I2 | 11/20/2019 | 6.91114 | 1 | 20.18 | -4.35 | 2.94 |
| RedHills | I2 | 1/8/2020 | 2.25108 | 1 | 3.78 | 1.15 | NA |
| RedHills | I2 | 2/26/2020 | 18.7124 | 0.39 | 10.55 | 4.52 | -5.34 |
| RedHills | I2 | 5/6/2020 | 15.6093 | 1 | 29.82 | -2.46 | 1.63 |
| RedHills | I2 | 6/11/2020 | 13.7149 | 0.88 | 15.08 | -0.69 | 0.75 |
| RedHills | I2 | 7/27/2020 | 7.70382 | 0.88 | 10.03 | -1.07 | 0.8 |
| RedHills | I2 | 9/22/2020 | 19.3914 | 0.97 | 28.62 | -1.14 | 0.49 |
| RedHills | I2 | 11/5/2020 | 3.04425 | 0.47 | 2.29 | 1.5 | -1.41 |
| RedHills | I2 | 12/8/2020 | 2.646 | 0.89 | 4.89 | -3.08 | 2.7 |
| RedHills | I2 | 4/19/2021 | 2.06311 | 0.6 | 1.26 | 1.85 | -1.34 |
| RedHills | I2 | 5/24/2021 | 5.79839 | 0.99 | 2.34 | 2.76 | -1.6 |
| RedHills | I2 | 7/8/2021 | 21.1839 | 0.16 | 20.88 | -0.03 | NA |
| RedHills | I2 | 8/11/2021 | 7.08752 | 0.51 | 4.87 | -0.71 | NA |
| RedHills | I2 | 9/9/2021 | 0.977369 | 0.86 | 0.4 | 3.07 | -2.1 |
| RedHills | I2 | 12/3/2021 | 25.091 | 0.89 | 36.33 | -1.34 | 0.86 |
| RedHills | I2 | 3/16/2022 | 2.76165 | 0.96 | 2.88 | 0.08 | NA |
| RedHills | I2 | 5/17/2022 | 4.57238 | 0.32 | 5.03 | 0.19 | NA |
| RedHills | I2 | 7/2/2022 | 7.01828 | 0.66 | 12.55 | -2.81 | 2.4 |
| RedHills | I2 | 8/25/2022 | 7.55238 | 0.98 | 13.58 | -2.61 | 2.07 |
| RedHills | I2 | 10/20/2022 | 2.30508 | 1 | 7.12 | -5.26 | 4.17 |
| RedHills | I3 | 8/13/2019 | 43.7614 | 1 | 228.92 | -7 | 4.24 |
| RedHills | I3 | 9/9/2019 | 56.0508 | 0.99 | 196 | -4.99 | 3.13 |
| RedHills | I3 | 10/16/2019 | 16.44 | 1 | 60.4 | 3.57 | NA |
| RedHills | I3 | 11/20/2019 | 8.07888 | 0.99 | 27.9 | -5.24 | 3.62 |
| RedHills | I3 | 1/8/2020 | 3.15833 | 0.99 | 9.51 | -4.25 | 2.63 |
| RedHills | I3 | 2/26/2020 | 30.3981 | 0.98 | 123.86 | -6.01 | 4.08 |
| RedHills | I3 | 5/6/2020 | 21.7561 | 0.99 | 30.62 | 0.03 | -1.25 |
| RedHills | I3 | 6/11/2020 | 22.3997 | 0.89 | 23.44 | 0.75 | -1.32 |
| RedHills | I3 | 7/27/2020 | 10.7636 | 0.86 | 14.76 | -0.66 | -0.01 |
| RedHills | I3 | 9/22/2020 | 30.9349 | 0.98 | 43.21 | 0.71 | NA |
| RedHills | I3 | 11/5/2020 | 5.76552 | 1 | 7.92 | -0.96 | 0.46 |
| RedHills | I3 | 12/8/2020 | 4.59604 | 0.91 | 7.77 | -2.47 | 2.07 |
| RedHills | I3 | 4/19/2021 | 3.33064 | 0.99 | 3.74 | 0.88 | -1.79 |
| RedHills | I3 | 5/24/2021 | 11.2749 | 1 | 6.78 | 2.62 | -2.45 |
| RedHills | I3 | 7/8/2021 | 37.0012 | 0.94 | 46.85 | -0.35 | -0.22 |
| RedHills | I3 | 8/11/2021 | 9.62638 | 0.98 | 11.67 | -0.75 | 0.54 |
| RedHills | I3 | 9/9/2021 | 2.72554 | 0.81 | 1.89 | 2.94 | -3.43 |
| RedHills | I3 | 12/3/2021 | 33.5541 | 0.96 | 68.05 | -2.02 | 0.68 |
| RedHills | I3 | 3/16/2022 | 3.94252 | 0.98 | 3.18 | 1.94 | -2.32 |
| RedHills | I3 | 5/17/2022 | 5.66251 | 0.99 | 6.91 | 0.25 | -1.06 |
| RedHills | I3 | 7/2/2022 | 6.95618 | 0.61 | 7.65 | 0.19 | NA |
| RedHills | I3 | 8/25/2022 | 10.4249 | 0.86 | 16.58 | 0.11 | -1.96 |
| RedHills | I3 | 10/20/2022 | 2.54535 | 0.98 | 6.18 | -3.43 | 2.25 |
| TwinValley | A1 | 6/6/2019 | 79.9377 | 1 | 440.66 | -7.58 | 4.95 |
| TwinValley | A1 | 6/27/2019 | 367.212 | 0.99 | 1080.41 | -4.59 | 3.29 |
| TwinValley | A1 | 7/18/2019 | 36.7666 | 0.93 | 66.06 | -2.24 | 1.51 |
| TwinValley | A1 | 8/14/2019 | 216.031 | 1 | 787.44 | -5.51 | 3.81 |
| TwinValley | A1 | 10/15/2019 | 68.2061 | 0.99 | 253 | -5.85 | 4.3 |
| TwinValley | A1 | 11/19/2019 | 141.045 | 1 | 506.03 | -5.33 | 3.58 |
| TwinValley | A1 | 1/7/2020 | 22.914 | 1 | 67.65 | -4.75 | 3.54 |
| TwinValley | A1 | 2/26/2020 | 112.372 | 0.68 | 6.06 | 24.61 | -36.49 |
| TwinValley | A1 | 5/5/2020 | 27.0895 | 0.93 | 56.69 | -2.23 | 0.9 |
| TwinValley | A1 | 6/12/2020 | 11.8614 | 1 | 21.27 | -2.89 | 2.5 |
| TwinValley | A1 | 9/25/2020 | 24.8782 | 0.99 | 37.64 | -2.3 | 2.16 |
| TwinValley | A1 | 11/5/2020 | 3.00467 | 0.99 | 5 | 1.12 | NA |
| TwinValley | A1 | 12/8/2020 | 1.34541 | 0.95 | 6.51 | -8.04 | 6.54 |
| TwinValley | A1 | 4/20/2021 | 4.3309 | 1 | 7.85 | -2.18 | 1.38 |
| TwinValley | A1 | 5/25/2021 | 6.17183 | 0.99 | 11.83 | -2.22 | 1.24 |
| TwinValley | A1 | 7/7/2021 | 18.9838 | 1 | 49.71 | -4.6 | 3.78 |
| TwinValley | A1 | 8/11/2021 | 6.72929 | 1 | 24.7 | -6.82 | 5.86 |
| TwinValley | A1 | 9/9/2021 | 1.66164 | 0.94 | 3.53 | -2.66 | 1.54 |
| TwinValley | A1 | 12/2/2021 | 0.573662 | 0.94 | 1.22 | -2.66 | 1.54 |
| TwinValley | A1 | 5/16/2022 | 2.61527 | 0.36 | 2.21 | 1.29 | -1.44 |
| TwinValley | A1 | 7/1/2022 | 2.6255 | 0.96 | 13.25 | -8.58 | 7.19 |
| TwinValley | A1 | 8/24/2022 | 7.42713 | 0.99 | 102.02 | -18.24 | 16 |
| TwinValley | A1 | 10/19/2022 | 1.14547 | 0.97 | 1.3 | 0.25 | NA |
| TwinValley | A2 | 6/6/2019 | 75.8607 | 0.94 | 885.09 | -16.67 | 14.82 |
| TwinValley | A2 | 6/27/2019 | 382.961 | 1 | 1113.47 | -4.17 | 2.66 |
| TwinValley | A2 | 7/18/2019 | 45.4003 | 1 | 132.8 | -4.26 | 2.78 |
| TwinValley | A2 | 8/14/2019 | 276.816 | 1 | 1210.94 | -6.26 | 4.11 |
| TwinValley | A2 | 9/26/2019 | 164.679 | 0.97 | 753.89 | 4.53 | NA |
| TwinValley | A2 | 10/15/2019 | 103.211 | 0.99 | 402.47 | -6.4 | 4.95 |
| TwinValley | A2 | 11/19/2019 | 130.456 | 0.99 | 496.37 | -5.68 | 3.88 |
| TwinValley | A2 | 1/7/2020 | 27.718 | 0.99 | 90.59 | -4.87 | 3.28 |
| TwinValley | A2 | 2/26/2020 | 209.757 | 1 | 503.7 | -2.57 | 0.83 |
| TwinValley | A2 | 5/5/2020 | 30.8043 | 0.98 | 129.18 | -6.76 | 5.18 |
| TwinValley | A2 | 6/12/2020 | 22.6271 | 0.98 | 59.44 | -3.08 | 1.28 |
| TwinValley | A2 | 7/30/2020 | 37.6878 | 0.96 | 171.1 | 4.49 | NA |
| TwinValley | A2 | 9/25/2020 | 38.4718 | 0.98 | 109.18 | -4.3 | 2.99 |
| TwinValley | A2 | 11/5/2020 | 9.67899 | 0.99 | 47.25 | -7.61 | 5.81 |
| TwinValley | A2 | 12/8/2020 | 3.79449 | 1 | 25.14 | -9.56 | 7.25 |
| TwinValley | A2 | 4/20/2021 | 9.67917 | 0.99 | 65.9 | -9.87 | 7.59 |
| TwinValley | A2 | 5/25/2021 | 16.1967 | 1 | 104.58 | -9.01 | 6.44 |
| TwinValley | A2 | 7/7/2021 | 36.6676 | 0.98 | 172.92 | 4.67 | NA |
| TwinValley | A2 | 8/11/2021 | 11.2261 | 1 | 45.85 | -5.8 | 3.68 |
| TwinValley | A2 | 9/9/2021 | 2.20475 | 1 | 3.86 | -1.63 | 0.63 |
| TwinValley | A2 | 12/2/2021 | 0.761165 | 1 | 1.33 | -1.63 | 0.63 |
| TwinValley | A2 | 3/16/2022 | 2.80759 | 0.96 | 1.21 | 4 | -3.6 |
| TwinValley | A2 | 5/16/2022 | 6.10559 | 0.38 | 3.28 | 4.55 | -5.21 |
| TwinValley | A2 | 7/1/2022 | 2.41327 | 1 | 5.43 | -1.67 | -0.47 |
| TwinValley | A2 | 8/24/2022 | 3.52547 | 0.96 | 8.83 | 2.24 | NA |
| TwinValley | A2 | 10/19/2022 | 1.48564 | 0.93 | 1.19 | -0.43 | NA |
| TwinValley | A3 | 6/6/2019 | 66.475 | 1 | 313.97 | -6.7 | 4.41 |
| TwinValley | A3 | 6/27/2019 | 459.277 | 0.99 | 1219.14 | -3.1 | 1.26 |
| TwinValley | A3 | 7/18/2019 | 60.2102 | 0.95 | 100.07 | -1.13 | 0.02 |
| TwinValley | A3 | 8/14/2019 | 216.974 | 0.98 | 439.52 | -1.89 | 0.45 |
| TwinValley | A3 | 9/26/2019 | 199.05 | 1 | 396.97 | -2.07 | 0.82 |
| TwinValley | A3 | 10/15/2019 | 99.5588 | 0.95 | 197.97 | 1.58 | NA |
| TwinValley | A3 | 11/19/2019 | 147.967 | 0.99 | 331.42 | -1.95 | 0.09 |
| TwinValley | A3 | 1/7/2020 | 23.9819 | 0.92 | 36.86 | -0.78 | -0.26 |
| TwinValley | A3 | 2/26/2020 | 160.069 | 0.32 | 89.77 | 3.86 | -4.21 |
| TwinValley | A3 | 5/5/2020 | 23.1578 | 1 | 37.58 | 1.06 | NA |
| TwinValley | A3 | 6/12/2020 | 20.3206 | 0.86 | 2.42 | -3.38 | NA |
| TwinValley | A3 | 7/30/2020 | 23.1885 | 0.07 | 23.05 | -0.01 | NA |
| TwinValley | A3 | 9/25/2020 | 31.692 | 0.83 | 34.64 | -0.09 | -0.13 |
| TwinValley | A3 | 11/5/2020 | 4.32239 | 0.13 | 4.1 | 0.58 | -0.71 |
| TwinValley | A3 | 12/8/2020 | 4.47847 | 0.98 | 47.87 | -15.08 | 13.01 |
| TwinValley | A3 | 5/25/2021 | 9.94455 | 0.96 | 15.65 | -0.62 | -0.62 |
| TwinValley | A3 | 7/7/2021 | 19.7872 | 0.72 | 20.02 | 0.38 | -0.61 |
| TwinValley | A3 | 8/11/2021 | 6.17291 | 1 | 14.57 | -3.65 | 2.71 |
| TwinValley | A3 | 9/9/2021 | 5.4131 | 0.84 | 0.21 | -4.86 | NA |
| TwinValley | A3 | 12/2/2021 | 1.86881 | 0.84 | 0.07 | -4.86 | NA |
| TwinValley | A3 | 3/16/2022 | 2.28584 | 0.96 | 0.82 | 4.06 | -3.16 |
| TwinValley | A3 | 5/16/2022 | 1.97166 | 0.91 | 1.46 | 1.07 | -0.73 |
| TwinValley | A3 | 7/1/2022 | 3.29788 | 1 | 0 | 39.36 | -33.12 |
| TwinValley | A3 | 10/19/2022 | 1.08969 | 0.56 | 0.82 | -0.55 | NA |
| TwinValley | B1 | 6/6/2019 | 69.0955 | 0.9 | 364.02 | -9.26 | 8.02 |
| TwinValley | B1 | 6/27/2019 | 350.918 | 1 | 864.49 | -3.73 | 2.67 |
| TwinValley | B1 | 7/18/2019 | 44.9261 | 1 | 97.72 | -3.34 | 2.52 |
| TwinValley | B1 | 8/14/2019 | 206.922 | 1 | 493.07 | -2.97 | 1.56 |
| TwinValley | B1 | 10/15/2019 | 80.6794 | 0.98 | 139.48 | -2.58 | 2.16 |
| TwinValley | B1 | 11/19/2019 | 107.671 | 1 | 197.58 | -1.46 | 0.16 |
| TwinValley | B1 | 1/7/2020 | 32.1579 | 0.99 | 77.55 | -2.78 | 1.17 |
| TwinValley | B1 | 2/26/2020 | 227.576 | 0.96 | 461.66 | -1.42 | -0.38 |
| TwinValley | B1 | 5/5/2020 | 18.3792 | 0.91 | 26.28 | -0.34 | -0.7 |
| TwinValley | B1 | 6/12/2020 | 13.3458 | 0.8 | 15.4 | 0.29 | NA |
| TwinValley | B1 | 7/30/2020 | 18.3999 | 0.97 | 30.42 | -2.1 | 1.59 |
| TwinValley | B1 | 9/25/2020 | 20.6853 | 0.02 | 21.13 | 0.04 | NA |
| TwinValley | B1 | 11/5/2020 | 2.18163 | 0.86 | 3.2 | 0.82 | NA |
| TwinValley | B1 | 12/8/2020 | 1.15395 | 0.96 | 2.09 | -2.81 | 2.35 |
| TwinValley | B1 | 4/20/2021 | 3.30073 | 0.95 | 4.69 | -0.95 | 0.32 |
| TwinValley | B1 | 5/25/2021 | 7.29931 | 1 | 19.93 | -4.36 | 3.24 |
| TwinValley | B1 | 7/7/2021 | 15.8773 | 1 | 29.59 | -2.44 | 1.68 |
| TwinValley | B1 | 8/11/2021 | 6.89661 | 0.96 | 17.34 | -4.31 | 3.49 |
| TwinValley | B1 | 9/9/2021 | 0.93114 | 0.94 | 0.78 | 2.24 | -2.93 |
| TwinValley | B1 | 12/2/2021 | 0.321465 | 0.94 | 0.27 | 2.24 | -2.93 |
| TwinValley | B1 | 3/16/2022 | 1.96136 | 1 | 0.89 | 2.81 | -1.95 |
| TwinValley | B1 | 5/16/2022 | 2.27903 | 1 | 4.63 | -3.37 | 2.82 |
| TwinValley | B1 | 7/1/2022 | 1.34588 | 0.98 | 0.23 | 6.9 | -5.45 |
| TwinValley | B1 | 8/24/2022 | 1.48026 | 0.2 | 1.67 | 0.03 | -0.44 |
| TwinValley | B1 | 10/19/2022 | 0.991377 | 0.99 | 0.43 | 2.6 | -1.57 |
| TwinValley | B2 | 6/6/2019 | 66.4349 | 0.98 | 228.64 | -5.31 | 3.77 |
| TwinValley | B2 | 6/27/2019 | 311.365 | 1 | 681.7 | -2.7 | 1.48 |
| TwinValley | B2 | 7/18/2019 | 44.8972 | 1 | 88.83 | -2.46 | 1.5 |
| TwinValley | B2 | 8/14/2019 | 182.469 | 0.87 | 285.04 | 0.97 | NA |
| TwinValley | B2 | 9/26/2019 | 161.459 | 1 | 375.58 | -3.32 | 2.23 |
| TwinValley | B2 | 11/19/2019 | 100.922 | 0.99 | 191.56 | -2.29 | 1.38 |
| TwinValley | B2 | 1/7/2020 | 36.7114 | 1 | 109.73 | -4.33 | 2.8 |
| TwinValley | B2 | 2/26/2020 | 185.601 | 0.92 | 322.11 | -1 | -0.38 |
| TwinValley | B2 | 5/5/2020 | 20.4847 | 0.72 | 31.47 | -0.15 | -1.32 |
| TwinValley | B2 | 6/12/2020 | 13.4051 | 0.71 | 18.33 | -0.83 | 0.27 |
| TwinValley | B2 | 7/30/2020 | 15.838 | 0.62 | 27.23 | 1.2 | NA |
| TwinValley | B2 | 9/25/2020 | 22.4075 | 0.49 | 25.5 | -0.92 | 0.99 |
| TwinValley | B2 | 11/5/2020 | 2.76106 | 1 | 4.29 | -2.14 | 1.85 |
| TwinValley | B2 | 12/8/2020 | 0.981786 | 0.84 | 2.55 | -5.13 | 4.6 |
| TwinValley | B2 | 4/20/2021 | 3.6769 | 0.9 | 9.14 | 2.21 | NA |
| TwinValley | B2 | 5/25/2021 | 9.61283 | 0.98 | 25.73 | -4.33 | 3.28 |
| TwinValley | B2 | 7/7/2021 | 17.4427 | 0.96 | 38.39 | -3.51 | 2.74 |
| TwinValley | B2 | 8/11/2021 | 7.50204 | 0.99 | 29.81 | -7.14 | 6.02 |
| TwinValley | B2 | 9/9/2021 | 1.15447 | 0.73 | 4.35 | -7.48 | 6.72 |
| TwinValley | B2 | 12/2/2021 | 0.398567 | 0.73 | 1.5 | -7.48 | 6.72 |
| TwinValley | B2 | 3/16/2022 | 2.22066 | 0.22 | 1.94 | 0.13 | 0.2 |
| TwinValley | B2 | 5/16/2022 | 2.01001 | 0.99 | 2.85 | -1.63 | 1.37 |
| TwinValley | B2 | 7/1/2022 | 1.53387 | 0.8 | 0.53 | 3.91 | -2.85 |
| TwinValley | B2 | 8/24/2022 | 1.92447 | 0.95 | 5.29 | 2.53 | NA |
| TwinValley | B2 | 10/19/2022 | 1.30333 | 0.54 | 2.75 | -4.41 | 4.21 |
| TwinValley | B3 | 6/6/2019 | 78.4342 | 0.98 | 343.29 | -5.75 | 3.15 |
| TwinValley | B3 | 6/27/2019 | 399.588 | 0.96 | 1203.09 | -4.06 | 2.3 |
| TwinValley | B3 | 7/18/2019 | 59.3015 | 0.98 | 151.64 | -3.28 | 1.75 |
| TwinValley | B3 | 8/14/2019 | 270.907 | 0.97 | 966.02 | -5.23 | 3.46 |
| TwinValley | B3 | 9/26/2019 | 216.627 | 0.99 | 721.02 | -4.66 | 2.82 |
| TwinValley | B3 | 10/15/2019 | 116.996 | 0.99 | 354.13 | -4.05 | 2.26 |
| TwinValley | B3 | 11/19/2019 | 140.933 | 1 | 440.59 | -4.04 | 2.07 |
| TwinValley | B3 | 1/7/2020 | 31.8425 | 0.99 | 130.71 | -6.31 | 4.55 |
| TwinValley | B3 | 2/26/2020 | 197.02 | 1 | 478.15 | -2.88 | 1.32 |
| TwinValley | B3 | 5/5/2020 | 32.6219 | 0.97 | 74.62 | -2.48 | 0.92 |
| TwinValley | B3 | 6/12/2020 | 15.9607 | 0.76 | 22.09 | 0.69 | NA |
| TwinValley | B3 | 7/30/2020 | 27.4541 | 0.93 | 85.51 | 2.95 | NA |
| TwinValley | B3 | 9/25/2020 | 31.6504 | 0.97 | 51.18 | -1.53 | 0.77 |
| TwinValley | B3 | 11/5/2020 | 4.98897 | 0.87 | 8.01 | 1.04 | NA |
| TwinValley | B3 | 12/8/2020 | 1.72322 | 0.93 | 6.65 | -6.14 | 4.57 |
| TwinValley | B3 | 4/20/2021 | 3.26469 | 0.86 | 7.25 | -3.09 | 2.04 |
| TwinValley | B3 | 5/25/2021 | 10.7961 | 0.99 | 26.65 | -3.29 | 1.94 |
| TwinValley | B3 | 7/7/2021 | 25.8777 | 0.98 | 75.58 | -4.12 | 2.56 |
| TwinValley | B3 | 8/11/2021 | 11.0983 | 1 | 35.5 | -4.28 | 2.38 |
| TwinValley | B3 | 9/9/2021 | 2.44493 | 0.98 | 4.99 | -2.42 | 1.3 |
| TwinValley | B3 | 12/2/2021 | 0.844081 | 0.98 | 1.72 | -2.42 | 1.3 |
| TwinValley | B3 | 3/16/2022 | 2.70839 | 0.82 | 1.07 | 4.95 | -4.82 |
| TwinValley | B3 | 5/16/2022 | 2.93277 | 0.98 | 6.43 | -3.05 | 2.03 |
| TwinValley | B3 | 7/1/2022 | 3.42251 | 0.98 | 10.92 | -4.95 | 3.53 |
| TwinValley | B3 | 8/24/2022 | 9.40225 | 0.99 | 112.64 | -15.25 | 12.27 |
| TwinValley | B3 | 10/19/2022 | 1.83757 | 0.84 | 3.38 | -2.71 | 2.16 |
| TwinValley | C1 | 6/6/2019 | 82.3639 | 0.99 | 340.99 | -6.35 | 4.57 |
| TwinValley | C1 | 6/27/2019 | 270.26 | 1 | 716.36 | -3.36 | 1.73 |
| TwinValley | C1 | 7/18/2019 | 44.4045 | 0.99 | 131.63 | -4.23 | 2.67 |
| TwinValley | C1 | 8/14/2019 | 251.792 | 1 | 936.58 | -5.25 | 3.26 |
| TwinValley | C1 | 9/26/2019 | 193.742 | 1 | 648.65 | -4.91 | 3.23 |
| TwinValley | C1 | 10/15/2019 | 86.3927 | 0.7 | 181.45 | 1.73 | NA |
| TwinValley | C1 | 11/19/2019 | 127.745 | 0.99 | 375.01 | -5.28 | 4.38 |
| TwinValley | C1 | 1/7/2020 | 44.9958 | 1 | 191.23 | -6.52 | 4.72 |
| TwinValley | C1 | 2/26/2020 | 243.237 | 1 | 758.1 | -4.49 | 2.87 |
| TwinValley | C1 | 5/5/2020 | 26.2959 | 0.98 | 76.01 | -3.67 | 1.83 |
| TwinValley | C1 | 6/12/2020 | 16.309 | 0.99 | 49.38 | -4.78 | 3.48 |
| TwinValley | C1 | 7/30/2020 | 40.2181 | 1 | 176.85 | -6.71 | 4.85 |
| TwinValley | C1 | 9/25/2020 | 41.2736 | 1 | 104.55 | -4.17 | 3.24 |
| TwinValley | C1 | 11/5/2020 | 4.16529 | 1 | 12.5 | -5.18 | 4.15 |
| TwinValley | C1 | 12/8/2020 | 2.57867 | 0.98 | 14.9 | -8.88 | 6.97 |
| TwinValley | C1 | 4/20/2021 | 10.3585 | 1 | 75.02 | -10.53 | 8.3 |
| TwinValley | C1 | 5/25/2021 | 12.0866 | 0.99 | 47.85 | -6.41 | 4.9 |
| TwinValley | C1 | 7/7/2021 | 34.9541 | 1 | 159.86 | -6.99 | 5.12 |
| TwinValley | C1 | 8/11/2021 | 12.1826 | 0.99 | 55.4 | -7.58 | 6.12 |
| TwinValley | C1 | 9/9/2021 | 1.19339 | 0.17 | 0.82 | 1.06 | -0.49 |
| TwinValley | C1 | 12/2/2021 | 0.412003 | 0.17 | 0.28 | 1.06 | -0.49 |
| TwinValley | C1 | 3/16/2022 | 2.11602 | 0.61 | 1.33 | 1.66 | -1.13 |
| TwinValley | C1 | 5/16/2022 | 2.62632 | 1 | 6.33 | -4.62 | 4.09 |
| TwinValley | C1 | 8/24/2022 | 3.60325 | 0.99 | 22.35 | 6.19 | NA |
| TwinValley | C1 | 10/19/2022 | 1.72254 | 0.95 | 4.32 | -5.54 | 5.29 |
| TwinValley | C2 | 6/6/2019 | 67.0145 | 0.99 | 192.23 | -4.34 | 3 |
| TwinValley | C2 | 6/27/2019 | 269.713 | 1 | 782.93 | -4.39 | 3.04 |
| TwinValley | C2 | 7/18/2019 | 45.6854 | 1 | 134.13 | -4.23 | 2.71 |
| TwinValley | C2 | 8/14/2019 | 270.432 | 1 | 1068.38 | -5.69 | 3.69 |
| TwinValley | C2 | 9/26/2019 | 260.541 | 1 | 1268 | -7.27 | 5.24 |
| TwinValley | C2 | 10/15/2019 | 95.4541 | 1 | 319.68 | -5.47 | 4.15 |
| TwinValley | C2 | 11/19/2019 | 127.967 | 0.96 | 443.21 | -5.92 | 4.71 |
| TwinValley | C2 | 1/7/2020 | 46.9774 | 0.99 | 191.08 | -6.16 | 4.35 |
| TwinValley | C2 | 2/26/2020 | 306.242 | 1 | 1047.14 | -4.66 | 2.68 |
| TwinValley | C2 | 5/5/2020 | 27.5232 | 1 | 80.61 | -3.07 | 0.64 |
| TwinValley | C2 | 6/12/2020 | 20.4217 | 0.98 | 74.99 | -6.18 | 4.88 |
| TwinValley | C2 | 7/30/2020 | 47.3728 | 1 | 202.55 | -6.48 | 4.62 |
| TwinValley | C2 | 9/25/2020 | 45.2639 | 0.99 | 132.61 | -4.82 | 3.68 |
| TwinValley | C2 | 11/5/2020 | 5.21806 | 0.99 | 15.05 | -4.67 | 3.51 |
| TwinValley | C2 | 12/8/2020 | 2.22554 | 0.99 | 10.36 | -6.56 | 4.24 |
| TwinValley | C2 | 4/20/2021 | 9.05096 | 0.99 | 54.09 | -8.69 | 6.43 |
| TwinValley | C2 | 5/25/2021 | 14.7121 | 0.99 | 66.97 | -7.26 | 5.59 |
| TwinValley | C2 | 7/7/2021 | 38.1632 | 0.99 | 181.3 | -7.48 | 5.73 |
| TwinValley | C2 | 8/11/2021 | 12.3317 | 1 | 67.14 | -8.55 | 6.76 |
| TwinValley | C2 | 9/9/2021 | 1.65646 | 0.58 | 2.26 | -0.82 | 0.26 |
| TwinValley | C2 | 12/2/2021 | 0.571874 | 0.58 | 0.78 | -0.82 | 0.26 |
| TwinValley | C2 | 3/16/2022 | 1.73876 | 0.68 | 2.23 | 0.02 | -0.85 |
| TwinValley | C2 | 5/16/2022 | 2.28618 | 0.92 | 4.99 | 1.84 | NA |
| TwinValley | C2 | 7/1/2022 | 26.5915 | 1 | 466.32 | -21.03 | 17.95 |
| TwinValley | C2 | 8/24/2022 | 3.45693 | 0.99 | 14.97 | -6.73 | 4.97 |
| TwinValley | C2 | 10/19/2022 | 1.46923 | 0.92 | 2.66 | -2.69 | 2.17 |
| TwinValley | C3 | 6/6/2019 | 85.0638 | 0.99 | 356.22 | -6.41 | 4.61 |
| TwinValley | C3 | 6/27/2019 | 296.756 | 0.98 | 886.16 | -4.94 | 3.8 |
| TwinValley | C3 | 7/18/2019 | 47.3807 | 0.98 | 123.65 | -3.98 | 2.82 |
| TwinValley | C3 | 8/14/2019 | 300.001 | 0.97 | 865.82 | 2.69 | NA |
| TwinValley | C3 | 9/26/2019 | 250.691 | 0.99 | 1128.48 | -6.84 | 4.95 |
| TwinValley | C3 | 10/15/2019 | 138.119 | 0.98 | 544.84 | -5.94 | 4.13 |
| TwinValley | C3 | 11/19/2019 | 128.643 | 0.96 | 371.78 | -4.44 | 3.14 |
| TwinValley | C3 | 1/7/2020 | 52.8007 | 0.99 | 298.33 | -8.34 | 6.18 |
| TwinValley | C3 | 2/26/2020 | 324.536 | 0.98 | 1108.74 | -4.58 | 2.54 |
| TwinValley | C3 | 5/5/2020 | 37.6127 | 1 | 181.25 | -7.66 | 5.95 |
| TwinValley | C3 | 6/12/2020 | 23.8618 | 0.98 | 56.04 | -3.03 | 1.72 |
| TwinValley | C3 | 7/30/2020 | 44.2991 | 0.94 | 188.67 | 4.19 | NA |
| TwinValley | C3 | 9/25/2020 | 45.9788 | 0.88 | 128.08 | 2.57 | NA |
| TwinValley | C3 | 11/5/2020 | 4.81907 | 0.99 | 13.03 | 2.48 | NA |
| TwinValley | C3 | 12/8/2020 | 3.88213 | 0.97 | 24.12 | -9.4 | 7.4 |
| TwinValley | C3 | 4/20/2021 | 10.003 | 0.98 | 57.34 | -8.83 | 6.93 |
| TwinValley | C3 | 5/25/2021 | 16.6423 | 1 | 66.32 | -6.19 | 4.51 |
| TwinValley | C3 | 7/7/2021 | 43.9116 | 0.99 | 178.76 | -6.41 | 4.76 |
| TwinValley | C3 | 8/11/2021 | 12.5914 | 1 | 56.32 | -7.07 | 5.36 |
| TwinValley | C3 | 9/9/2021 | 1.76508 | 0.85 | 3.64 | -4.33 | 4.17 |
| TwinValley | C3 | 12/2/2021 | 0.609372 | 0.85 | 1.26 | -4.33 | 4.17 |
| TwinValley | C3 | 3/16/2022 | 2.75198 | 0.49 | 2.7 | -0.27 | 0.45 |
| TwinValley | C3 | 5/16/2022 | 2.97794 | 0.55 | 4.85 | 1.07 | NA |
| TwinValley | C3 | 7/1/2022 | 5.65001 | 1 | 21.77 | -6.43 | 5.05 |
| TwinValley | C3 | 8/24/2022 | 2.47893 | 0.93 | 17.91 | 7.22 | NA |
| TwinValley | C3 | 10/19/2022 | 1.83283 | 0.87 | 6.15 | -6.49 | 5.71 |
| TwinValley | D1 | 6/27/2019 | 201.898 | 0.97 | 912.27 | -6.8 | 4.87 |
| TwinValley | D1 | 7/18/2019 | 53.9872 | 0.98 | 172.37 | -4.69 | 3.09 |
| TwinValley | D1 | 8/14/2019 | 208.187 | 0.98 | 690.72 | -4.74 | 2.99 |
| TwinValley | D1 | 9/26/2019 | 128.624 | 0.94 | 280.8 | -2.3 | 0.82 |
| TwinValley | D1 | 10/15/2019 | 79.9932 | 0.96 | 141.11 | 1.27 | NA |
| TwinValley | D1 | 11/19/2019 | 111.661 | 0.99 | 222.62 | -1.57 | -0.02 |
| TwinValley | D1 | 1/7/2020 | 28.0971 | 0.97 | 85.7 | -4.56 | 3.09 |
| TwinValley | D1 | 2/26/2020 | 198.567 | 0.99 | 459.16 | -1.86 | -0.25 |
| TwinValley | D1 | 5/5/2020 | 30.218 | 0.93 | 68.18 | -2.37 | 0.78 |
| TwinValley | D1 | 6/12/2020 | 16.6038 | 0.99 | 25.13 | -0.45 | -0.74 |
| TwinValley | D1 | 7/30/2020 | 27.7859 | 0.92 | 67.95 | 2.16 | NA |
| TwinValley | D1 | 9/25/2020 | 35.809 | 0.72 | 56.33 | 0.99 | NA |
| TwinValley | D1 | 11/5/2020 | 5.10208 | 0.89 | 6.36 | 0.46 | NA |
| TwinValley | D1 | 12/8/2020 | 1.57175 | 1 | 4.51 | -4.3 | 2.94 |
| TwinValley | D1 | 4/20/2021 | 4.27447 | 0.97 | 9.41 | -2.23 | 0.67 |
| TwinValley | D1 | 5/25/2021 | 10.3417 | 0.99 | 24.57 | -2.51 | 0.79 |
| TwinValley | D1 | 7/7/2021 | 21.8785 | 0.84 | 54.45 | 2.22 | NA |
| TwinValley | D1 | 8/11/2021 | 8.34924 | 0.93 | 17.37 | -1.92 | 0.38 |
| TwinValley | D1 | 9/9/2021 | 1.57496 | 0.68 | 2.92 | -1.94 | 0.91 |
| TwinValley | D1 | 12/2/2021 | 0.543738 | 0.68 | 1.01 | -1.94 | 0.91 |
| TwinValley | D1 | 3/16/2022 | 2.04139 | 0.59 | 2.38 | -0.32 | 0.01 |
| TwinValley | D1 | 5/16/2022 | 2.59884 | 0.89 | 3.18 | 0.2 | -0.99 |
| TwinValley | D1 | 10/19/2022 | 2.2159 | 0.81 | 2.1 | 1.42 | -2.04 |
| TwinValley | D2 | 6/6/2019 | 267.201 | 0.99 | 857.51 | -4.41 | 2.58 |
| TwinValley | D2 | 6/27/2019 | 166.32 | 0.96 | 495.84 | -4.24 | 2.67 |
| TwinValley | D2 | 7/18/2019 | 64.1082 | 1 | 176 | -3.56 | 1.89 |
| TwinValley | D2 | 8/14/2019 | 261.54 | 0.99 | 1163.8 | -6.41 | 4.27 |
| TwinValley | D2 | 9/26/2019 | 201.981 | 0.99 | 994.9 | -7.26 | 5.14 |
| TwinValley | D2 | 10/15/2019 | 109.575 | 0.99 | 523.59 | -6.85 | 4.6 |
| TwinValley | D2 | 11/19/2019 | 131.896 | 0.97 | 431.39 | -5.05 | 3.58 |
| TwinValley | D2 | 1/7/2020 | 29.0037 | 0.97 | 108.13 | -5.77 | 4.13 |
| TwinValley | D2 | 2/26/2020 | 215.617 | 0.99 | 546.5 | -2.56 | 0.53 |
| TwinValley | D2 | 5/5/2020 | 32.1992 | 0.99 | 95.89 | -4.24 | 2.68 |
| TwinValley | D2 | 6/12/2020 | 14.9223 | 0.91 | 36.9 | 2.2 | NA |
| TwinValley | D2 | 7/30/2020 | 28.2382 | 0.99 | 67.77 | -2.75 | 1.15 |
| TwinValley | D2 | 9/25/2020 | 32.2816 | 0.92 | 55.73 | -1.75 | 0.88 |
| TwinValley | D2 | 11/5/2020 | 4.75049 | 0.93 | 11.42 | -3.37 | 2.19 |
| TwinValley | D2 | 12/8/2020 | 2.23769 | 0.94 | 11.04 | -8.1 | 6.54 |
| TwinValley | D2 | 4/20/2021 | 5.06337 | 0.99 | 20.02 | -5.82 | 3.91 |
| TwinValley | D2 | 7/7/2021 | 33.3121 | 1 | 77.03 | -3.82 | 3.05 |
| TwinValley | D2 | 8/11/2021 | 9.91974 | 0.97 | 25.11 | -3.55 | 2.26 |
| TwinValley | D2 | 9/9/2021 | 1.93567 | 0.77 | 3.08 | -2.66 | 2.54 |
| TwinValley | D2 | 12/2/2021 | 0.668269 | 0.77 | 1.06 | -2.66 | 2.54 |
| TwinValley | D2 | 3/16/2022 | 2.6201 | 0.95 | 1.29 | 3.74 | -3.58 |
| TwinValley | D2 | 5/16/2022 | 3.20436 | 0.91 | 4.72 | -0.76 | -0.12 |
| TwinValley | D2 | 7/1/2022 | 3.54069 | 1 | 1.41 | 3.57 | -2.71 |
| TwinValley | D2 | 8/24/2022 | 2.47736 | 0.94 | 4.37 | -2.81 | 2.44 |
| TwinValley | D2 | 10/19/2022 | 1.50756 | 0.97 | 1.23 | 0.69 | -0.42 |
| TwinValley | D3 | 6/6/2019 | 241.868 | 0.95 | 920.58 | 3.71 | NA |
| TwinValley | D3 | 6/27/2019 | 181.137 | 1 | 524.28 | -3.83 | 2.1 |
| TwinValley | D3 | 7/18/2019 | 86.6811 | 1 | 367.77 | -6.14 | 4.08 |
| TwinValley | D3 | 8/14/2019 | 263.472 | 0.99 | 1386.16 | -7.73 | 5.56 |
| TwinValley | D3 | 9/26/2019 | 151.508 | 0.96 | 765.18 | 5.02 | NA |
| TwinValley | D3 | 10/15/2019 | 89.2436 | 0.94 | 449.69 | 5.01 | NA |
| TwinValley | D3 | 11/19/2019 | 119.623 | 0.99 | 398.06 | -5.5 | 4.22 |
| TwinValley | D3 | 1/7/2020 | 30.411 | 1 | 126.95 | -6.38 | 4.57 |
| TwinValley | D3 | 2/26/2020 | 233.764 | 1 | 949.1 | -5.94 | 3.97 |
| TwinValley | D3 | 5/5/2020 | 36.8433 | 0.97 | 96.62 | 2.38 | NA |
| TwinValley | D3 | 6/12/2020 | 18.9809 | 0.96 | 59.54 | -4.94 | 3.58 |
| TwinValley | D3 | 7/30/2020 | 37.5532 | 1 | 168.89 | -6.72 | 4.74 |
| TwinValley | D3 | 9/25/2020 | 29.9889 | 0.93 | 82.25 | 2.52 | NA |
| TwinValley | D3 | 11/5/2020 | 5.12493 | 0.96 | 12.76 | -3.78 | 2.7 |
| TwinValley | D3 | 12/8/2020 | 2.6142 | 1 | 15.53 | -9.2 | 7.33 |
| TwinValley | D3 | 4/20/2021 | 6.09754 | 0.99 | 23.64 | -5.83 | 4.03 |
| TwinValley | D3 | 5/25/2021 | 14.6417 | 1 | 70.11 | -6.53 | 4 |
| TwinValley | D3 | 7/7/2021 | 35.0608 | 0.99 | 168.24 | -7.61 | 5.9 |
| TwinValley | D3 | 8/11/2021 | 9.81723 | 1 | 27.85 | -4.35 | 3.07 |
| TwinValley | D3 | 9/9/2021 | 2.21002 | 1 | 6.34 | -5.6 | 4.96 |
| TwinValley | D3 | 12/2/2021 | 0.762984 | 1 | 2.19 | -5.6 | 4.96 |
| TwinValley | D3 | 3/16/2022 | 2.57697 | 0.56 | 2.67 | 0.07 | NA |
| TwinValley | D3 | 5/16/2022 | 2.74804 | 0.83 | 3.75 | 0.66 | NA |
| TwinValley | D3 | 7/1/2022 | 3.32409 | 0.25 | 3.53 | 0.12 | NA |
| TwinValley | D3 | 10/19/2022 | 1.48627 | 0.7 | 1.87 | 0.48 | NA |
| TwinValley | E1 | 6/6/2019 | 247.569 | 1 | 803.37 | -4.32 | 2.37 |
| TwinValley | E1 | 6/27/2019 | 197.824 | 0.99 | 709.44 | -5 | 3.02 |
| TwinValley | E1 | 7/18/2019 | 55.243 | 0.99 | 178.07 | -4.09 | 1.99 |
| TwinValley | E1 | 8/14/2019 | 302.216 | 0.99 | 1581.88 | -7.59 | 5.35 |
| TwinValley | E1 | 9/26/2019 | 256.177 | 0.99 | 1251.95 | -7.17 | 5.04 |
| TwinValley | E1 | 10/15/2019 | 101.084 | 0.99 | 437.72 | -5.86 | 3.44 |
| TwinValley | E1 | 11/19/2019 | 131.498 | 0.98 | 371.54 | -3.94 | 2.41 |
| TwinValley | E1 | 1/7/2020 | 40.8723 | 0.98 | 203.34 | -6.78 | 4.2 |
| TwinValley | E1 | 2/26/2020 | 282.273 | 0.99 | 1016.97 | -5.01 | 3 |
| TwinValley | E1 | 5/5/2020 | 39.8571 | 1 | 168.4 | -5.83 | 3.53 |
| TwinValley | E1 | 6/12/2020 | 16.4015 | 0.88 | 54.64 | 3.19 | NA |
| TwinValley | E1 | 7/30/2020 | 41.9783 | 0.98 | 197.72 | -7.2 | 5.31 |
| TwinValley | E1 | 9/25/2020 | 34.6012 | 0.88 | 110.71 | 3.05 | NA |
| TwinValley | E1 | 11/5/2020 | 3.44808 | 0.81 | 7.77 | 1.92 | NA |
| TwinValley | E1 | 12/8/2020 | 1.12258 | 0.98 | 3.74 | -4.58 | 2.69 |
| TwinValley | E1 | 4/20/2021 | 6.71492 | 0.97 | 44 | -9.83 | 7.78 |
| TwinValley | E1 | 5/25/2021 | 15.0714 | 0.98 | 79.52 | -8.3 | 6.52 |
| TwinValley | E1 | 7/7/2021 | 27.4034 | 0.98 | 82.01 | -4.38 | 2.88 |
| TwinValley | E1 | 8/11/2021 | 9.02923 | 0.97 | 36.76 | -6.39 | 4.73 |
| TwinValley | E1 | 9/9/2021 | 1.13924 | 0.28 | 0.98 | 1.45 | -1.76 |
| TwinValley | E1 | 12/2/2021 | 0.393311 | 0.28 | 0.34 | 1.45 | -1.76 |
| TwinValley | E1 | 3/16/2022 | 1.85933 | 0.97 | 0.45 | 5.97 | -4.97 |
| TwinValley | E1 | 5/16/2022 | 2.21274 | 0.65 | 2.78 | 0.48 | NA |
| TwinValley | E1 | 7/1/2022 | 3.23238 | 1 | 19.17 | -9.21 | 7.36 |
| TwinValley | E1 | 10/19/2022 | 2.06502 | 0.78 | 6.14 | 2.79 | NA |
| TwinValley | E2 | 6/6/2019 | 282.438 | 1 | 896.33 | -4.59 | 2.94 |
| TwinValley | E2 | 6/27/2019 | 176.394 | 0.99 | 625.45 | -5.23 | 3.49 |
| TwinValley | E2 | 7/18/2019 | 48.0337 | 0.99 | 144.25 | -4.33 | 2.78 |
| TwinValley | E2 | 8/14/2019 | 272.468 | 0.97 | 1253.57 | 4.55 | NA |
| TwinValley | E2 | 9/26/2019 | 175.059 | 1 | 623.11 | -5.08 | 3.19 |
| TwinValley | E2 | 10/15/2019 | 78.6268 | 1 | 249.18 | -4.46 | 2.74 |
| TwinValley | E2 | 11/19/2019 | 123.795 | 1 | 338.36 | -3.6 | 1.99 |
| TwinValley | E2 | 1/7/2020 | 31.1298 | 0.99 | 114.68 | -4.69 | 2.29 |
| TwinValley | E2 | 2/26/2020 | 217.053 | 1 | 663.24 | -4 | 2.13 |
| TwinValley | E2 | 6/12/2020 | 15.0791 | 1 | 42.98 | 2.65 | NA |
| TwinValley | E2 | 7/30/2020 | 30.628 | 0.99 | 122.06 | 3.9 | NA |
| TwinValley | E2 | 9/25/2020 | 34.1685 | 1 | 100.94 | -4.23 | 2.69 |
| TwinValley | E2 | 11/5/2020 | 6.2074 | 0.12 | 10.48 | 1.16 | NA |
| TwinValley | E2 | 12/8/2020 | 2.15916 | 0.94 | 7.77 | -6.21 | 5 |
| TwinValley | E2 | 4/20/2021 | 3.76645 | 0.99 | 12.26 | 3.11 | NA |
| TwinValley | E2 | 5/25/2021 | 13.2623 | 1 | 54.39 | -6.12 | 4.23 |
| TwinValley | E2 | 7/7/2021 | 26.14 | 0.93 | 56.4 | 1.8 | NA |
| TwinValley | E2 | 8/11/2021 | 12.3908 | 0.99 | 71.51 | -9.14 | 7.39 |
| TwinValley | E2 | 9/9/2021 | 1.05501 | 0.99 | 0.81 | 1.76 | -1.87 |
| TwinValley | E2 | 12/2/2021 | 0.364229 | 0.99 | 0.28 | 1.76 | -1.87 |
| TwinValley | E2 | 3/16/2022 | 2.20159 | 0.14 | 1.75 | -0.44 | NA |
| TwinValley | E2 | 5/16/2022 | 2.57987 | 0.92 | 4.12 | -1.97 | 1.5 |
| TwinValley | E2 | 7/1/2022 | 3.68753 | 1 | 11.47 | -5.64 | 4.71 |
| TwinValley | E2 | 10/19/2022 | 2.00404 | 1 | 4.21 | -2.46 | 1.25 |
| TwinValley | E3 | 6/6/2019 | 269.359 | 0.98 | 842.31 | -4.46 | 2.81 |
| TwinValley | E3 | 6/27/2019 | 173.511 | 1 | 497.47 | -4.14 | 2.68 |
| TwinValley | E3 | 7/18/2019 | 42.3613 | 1 | 92.17 | -2.8 | 1.66 |
| TwinValley | E3 | 8/14/2019 | 229.856 | 1 | 825.67 | -5.38 | 3.67 |
| TwinValley | E3 | 9/26/2019 | 176.055 | 0.99 | 639.88 | -5.32 | 3.51 |
| TwinValley | E3 | 10/15/2019 | 82.4912 | 0.99 | 294.38 | -5.31 | 3.58 |
| TwinValley | E3 | 11/19/2019 | 132.984 | 1 | 453.61 | -5.13 | 3.52 |
| TwinValley | E3 | 1/7/2020 | 45.3637 | 0.99 | 239.42 | -7.8 | 5.67 |
| TwinValley | E3 | 2/26/2020 | 215.51 | 0.89 | 410.01 | -1.04 | -0.74 |
| TwinValley | E3 | 5/5/2020 | 32.3877 | 1 | 127.03 | -5.54 | 3.46 |
| TwinValley | E3 | 6/12/2020 | 16.406 | 0.98 | 47.98 | -4.73 | 3.56 |
| TwinValley | E3 | 7/30/2020 | 34.7972 | 1 | 141.2 | -6.14 | 4.33 |
| TwinValley | E3 | 9/25/2020 | 36.8302 | 0.99 | 111.91 | -5 | 3.83 |
| TwinValley | E3 | 11/5/2020 | 3.49596 | 0.99 | 14.18 | -6.49 | 4.92 |
| TwinValley | E3 | 12/8/2020 | 2.14033 | 1 | 7.88 | -6.53 | 5.41 |
| TwinValley | E3 | 5/25/2021 | 8.5999 | 0.98 | 47.67 | 5.52 | NA |
| TwinValley | E3 | 7/7/2021 | 23.7689 | 0.96 | 103.69 | 4.3 | NA |
| TwinValley | E3 | 8/11/2021 | 13.0446 | 1 | 48.56 | -5.65 | 3.94 |
| TwinValley | E3 | 9/9/2021 | 1.22422 | 0.95 | 3.23 | -4.61 | 3.78 |
| TwinValley | E3 | 12/2/2021 | 0.422648 | 0.95 | 1.11 | -4.61 | 3.78 |
| TwinValley | E3 | 3/16/2022 | 1.72724 | 1 | 0.65 | 5.68 | -5.85 |
| TwinValley | E3 | 5/16/2022 | 2.9452 | 0.99 | 6.53 | -4.05 | 3.54 |
| TwinValley | E3 | 7/1/2022 | 4.99026 | 1 | 13.42 | -3.94 | 2.63 |
| TwinValley | E3 | 10/19/2022 | 2.11667 | 0.93 | 7.04 | -5.26 | 3.85 |
| TwinValley | F1 | 6/6/2019 | 298.472 | 0.98 | 1058.85 | -4.97 | 3.03 |
| TwinValley | F1 | 6/27/2019 | 174.843 | 0.98 | 555.96 | -4.41 | 2.63 |
| TwinValley | F1 | 7/18/2019 | 49.0604 | 0.97 | 129.19 | -3.53 | 2.05 |
| TwinValley | F1 | 8/14/2019 | 256.118 | 0.99 | 918.15 | -4.95 | 2.93 |
| TwinValley | F1 | 9/26/2019 | 201.312 | 0.99 | 855.27 | -6.08 | 3.96 |
| TwinValley | F1 | 10/15/2019 | 84.1346 | 0.92 | 402.88 | 4.75 | NA |
| TwinValley | F1 | 11/19/2019 | 176.11 | 0.99 | 675.98 | -5.4 | 3.34 |
| TwinValley | F1 | 1/7/2020 | 40.9089 | 0.98 | 148.28 | -5.48 | 3.8 |
| TwinValley | F1 | 2/26/2020 | 265.221 | 0.97 | 411 | 0.41 | -2.38 |
| TwinValley | F1 | 5/5/2020 | 32.7964 | 0.93 | 46.97 | 4.36 | -10.7 |
| TwinValley | F1 | 6/12/2020 | 15.3886 | 0.92 | 20.46 | -0.43 | -0.28 |
| TwinValley | F1 | 7/30/2020 | 29.399 | 0.96 | 79.09 | -4.16 | 2.99 |
| TwinValley | F1 | 9/25/2020 | 38.5457 | 0.89 | 58.38 | 0.9 | NA |
| TwinValley | F1 | 11/5/2020 | 3.81871 | 0.86 | 7.09 | -2.47 | 1.75 |
| TwinValley | F1 | 12/8/2020 | 1.69687 | 0.88 | 2.67 | -2.09 | 1.74 |
| TwinValley | F1 | 4/20/2021 | 4.92097 | 0.96 | 10.31 | -2.34 | 1.07 |
| TwinValley | F1 | 5/25/2021 | 9.45705 | 1 | 16.31 | -1.99 | 1.26 |
| TwinValley | F1 | 7/7/2021 | 23.3455 | 0.8 | 49.57 | -3.05 | 2.16 |
| TwinValley | F1 | 8/11/2021 | 9.49328 | 0.99 | 26.95 | -4.56 | 3.4 |
| TwinValley | F1 | 3/16/2022 | 2.19909 | 0.87 | 1.17 | 2.32 | -1.65 |
| TwinValley | F1 | 5/16/2022 | 2.81766 | 0.97 | 3.56 | -0.39 | -0.15 |
| TwinValley | F1 | 7/1/2022 | 6.604 | 0.98 | 32.39 | -7.79 | 6.07 |
| TwinValley | F1 | 8/24/2022 | 4.53093 | 1 | 27.72 | -8.88 | 6.6 |
| TwinValley | F1 | 10/19/2022 | 2.87722 | 0.96 | 6.18 | -2.75 | 1.64 |
| TwinValley | F2 | 6/6/2019 | 238.681 | 0.98 | 582.49 | -3.01 | 1.52 |
| TwinValley | F2 | 6/27/2019 | 157.536 | 1 | 528.57 | -5.03 | 3.42 |
| TwinValley | F2 | 7/18/2019 | 44.1529 | 0.99 | 130.76 | -4.03 | 2.33 |
| TwinValley | F2 | 8/14/2019 | 254.99 | 1 | 936.45 | -5.54 | 3.84 |
| TwinValley | F2 | 9/26/2019 | 231.528 | 0.98 | 1147.27 | -7.8 | 6.04 |
| TwinValley | F2 | 10/15/2019 | 114.779 | 0.97 | 334.26 | 2.72 | NA |
| TwinValley | F2 | 11/19/2019 | 157.73 | 0.99 | 600.62 | -6.09 | 4.56 |
| TwinValley | F2 | 1/7/2020 | 46.6223 | 0.98 | 239.58 | -7.54 | 5.37 |
| TwinValley | F2 | 2/26/2020 | 309.077 | 0.91 | 679.15 | -1.66 | -0.35 |
| TwinValley | F2 | 5/5/2020 | 37.5666 | 0.99 | 107.61 | -3.65 | 1.85 |
| TwinValley | F2 | 6/12/2020 | 20.2641 | 0.97 | 53.71 | -4.49 | 3.57 |
| TwinValley | F2 | 7/30/2020 | 49.238 | 0.99 | 226.48 | -7 | 5.1 |
| TwinValley | F2 | 11/5/2020 | 5.78755 | 0.97 | 17.38 | -5.19 | 4.16 |
| TwinValley | F2 | 12/8/2020 | 2.57535 | 0.98 | 11.17 | -7.29 | 5.88 |
| TwinValley | F2 | 4/20/2021 | 8.95125 | 0.99 | 51.17 | -8.63 | 6.61 |
| TwinValley | F2 | 5/25/2021 | 14.1898 | 0.99 | 65.87 | -7.2 | 5.4 |
| TwinValley | F2 | 7/7/2021 | 38.4742 | 0.99 | 150.54 | -6.23 | 4.66 |
| TwinValley | F2 | 8/11/2021 | 11.7816 | 1 | 85.58 | -10.98 | 9.04 |
| TwinValley | F2 | 9/9/2021 | 1.70219 | 1 | 2.51 | -2.07 | 1.9 |
| TwinValley | F2 | 12/2/2021 | 0.587662 | 1 | 0.87 | -2.07 | 1.9 |
| TwinValley | F2 | 3/16/2022 | 2.22823 | 0.93 | 2.29 | 1.24 | -2.05 |
| TwinValley | F2 | 5/16/2022 | 2.78592 | 0.97 | 6.39 | -4.28 | 3.75 |
| TwinValley | F2 | 7/1/2022 | 5.55132 | 0.99 | 21.84 | -6.9 | 5.71 |
| TwinValley | F2 | 8/24/2022 | 3.08299 | 0.91 | 6.5 | 1.74 | NA |
| TwinValley | F2 | 10/19/2022 | 3.50302 | 1 | 11.67 | -5.37 | 4.01 |
| TwinValley | F3 | 6/6/2019 | 215.625 | 0.96 | 748.4 | 3.35 | NA |
| TwinValley | F3 | 6/27/2019 | 159.804 | 1 | 494.52 | -4.43 | 2.8 |
| TwinValley | F3 | 7/18/2019 | 43.9139 | 1 | 100.93 | -2.8 | 1.43 |
| TwinValley | F3 | 8/14/2019 | 225.656 | 1 | 665.4 | -4.03 | 2.35 |
| TwinValley | F3 | 9/26/2019 | 215.654 | 1 | 893.56 | -6.23 | 4.36 |
| TwinValley | F3 | 10/15/2019 | 97.1507 | 0.99 | 169.37 | 1.24 | NA |
| TwinValley | F3 | 11/19/2019 | 162.912 | 1 | 537.24 | -4.64 | 2.85 |
| TwinValley | F3 | 1/7/2020 | 47.2567 | 0.99 | 170.46 | -5.18 | 3.31 |
| TwinValley | F3 | 2/26/2020 | 260.846 | 0.83 | 369.59 | 0.32 | -1.79 |
| TwinValley | F3 | 5/5/2020 | 37.3801 | 0.89 | 69.14 | -0.46 | -1.68 |
| TwinValley | F3 | 6/12/2020 | 17.2246 | 0.99 | 25.56 | 0.85 | NA |
| TwinValley | F3 | 7/30/2020 | 33.3616 | 0.98 | 92.54 | -3.99 | 2.57 |
| TwinValley | F3 | 9/25/2020 | 46.0322 | 1 | 103.07 | 1.91 | NA |
| TwinValley | F3 | 11/5/2020 | 4.92455 | 1 | 12.89 | -4.16 | 3.11 |
| TwinValley | F3 | 12/8/2020 | 2.09195 | 0.96 | 4.04 | -3 | 2.42 |
| TwinValley | F3 | 4/20/2021 | 6.71387 | 1 | 18.73 | -3.8 | 2.23 |
| TwinValley | F3 | 5/25/2021 | 11.5543 | 0.99 | 25.67 | -2.71 | 1.44 |
| TwinValley | F3 | 7/7/2021 | 27.2792 | 0.98 | 76.38 | -4.45 | 3.28 |
| TwinValley | F3 | 8/11/2021 | 8.29896 | 1 | 17.28 | -2.71 | 1.69 |
| TwinValley | F3 | 9/9/2021 | 1.78085 | 1 | 2.62 | -1.12 | 0.46 |
| TwinValley | F3 | 12/2/2021 | 0.614818 | 1 | 0.9 | -1.12 | 0.46 |
| TwinValley | F3 | 3/16/2022 | 2.26946 | 0.95 | 0.97 | 3.16 | -2.31 |
| TwinValley | F3 | 5/16/2022 | 2.97474 | 1 | 4.19 | -1.12 | 0.62 |
| TwinValley | F3 | 7/1/2022 | 5.86331 | 0.98 | 16.52 | -4.62 | 3.53 |
| TwinValley | F3 | 8/24/2022 | 3.47783 | 1 | 13.65 | -5.98 | 4.23 |
| TwinValley | F3 | 10/19/2022 | 3.06067 | 0.97 | 6.4 | -2.46 | 1.28 |
| TwinValley | G1 | 6/6/2019 | 203.027 | 0.98 | 637.06 | -4.57 | 2.98 |
| TwinValley | G1 | 6/27/2019 | 156.599 | 0.88 | 396.77 | 2.27 | NA |
| TwinValley | G1 | 7/18/2019 | 47.2034 | 1 | 135.36 | -4.42 | 3.14 |
| TwinValley | G1 | 8/14/2019 | 168.579 | 0.99 | 747.01 | -6.67 | 4.75 |
| TwinValley | G1 | 9/26/2019 | 138.053 | 0.98 | 526.13 | -6.14 | 4.65 |
| TwinValley | G1 | 10/15/2019 | 62.7323 | 1 | 185.68 | -3.72 | 1.79 |
| TwinValley | G1 | 11/19/2019 | 93.3007 | 0.94 | 304.99 | -5.18 | 3.78 |
| TwinValley | G1 | 1/7/2020 | 28.5352 | 1 | 68.79 | -3.07 | 1.68 |
| TwinValley | G1 | 2/26/2020 | 212.99 | 1 | 686.62 | -4.52 | 2.75 |
| TwinValley | G1 | 5/5/2020 | 21.4708 | 1 | 52.59 | -3.38 | 2.13 |
| TwinValley | G1 | 6/12/2020 | 11.4208 | 1 | 16.22 | -0.35 | -0.65 |
| TwinValley | G1 | 7/30/2020 | 21.5977 | 1 | 50.48 | -2.63 | 1.07 |
| TwinValley | G1 | 9/25/2020 | 23.3557 | 0.95 | 42.7 | -2.17 | 1.33 |
| TwinValley | G1 | 11/5/2020 | 2.41199 | 0.99 | 2.82 | -0.38 | 0.1 |
| TwinValley | G1 | 12/8/2020 | 1.55271 | 0.85 | 2.1 | -1.42 | 1.21 |
| TwinValley | G1 | 4/20/2021 | 3.25752 | 0.99 | 5.04 | -1.67 | 1.14 |
| TwinValley | G1 | 5/25/2021 | 5.67086 | 1 | 11.53 | -2.46 | 1.4 |
| TwinValley | G1 | 7/7/2021 | 18.0149 | 0.99 | 33.55 | -2.21 | 1.33 |
| TwinValley | G1 | 8/11/2021 | 7.70919 | 1 | 18.75 | -3.33 | 2.07 |
| TwinValley | G1 | 9/9/2021 | 1.97961 | 0.99 | 3.57 | -3.24 | 3 |
| TwinValley | G1 | 12/2/2021 | 0.683436 | 0.99 | 1.23 | -3.24 | 3 |
| TwinValley | G1 | 3/16/2022 | 2.32855 | 0.32 | 2.43 | -0.03 | -0.09 |
| TwinValley | G1 | 5/16/2022 | 4.01575 | 0.09 | 3.13 | -0.48 | NA |
| TwinValley | G1 | 7/1/2022 | 4.06827 | 0.67 | 2.95 | 1.55 | -1.38 |
| TwinValley | G1 | 8/24/2022 | 5.06335 | 0.99 | 27.74 | -8.1 | 5.96 |
| TwinValley | G1 | 10/19/2022 | 0.89516 | 0.36 | 1.24 | -1.13 | 0.68 |
| TwinValley | G2 | 6/6/2019 | 221.863 | 0.97 | 673.3 | -4.31 | 2.7 |
| TwinValley | G2 | 6/27/2019 | 147.146 | 1 | 376.7 | -3.02 | 1.3 |
| TwinValley | G2 | 7/18/2019 | 46.1731 | 0.97 | 107.93 | -3.29 | 2.17 |
| TwinValley | G2 | 8/14/2019 | 168.236 | 1 | 536.63 | -4.77 | 3.23 |
| TwinValley | G2 | 9/26/2019 | 124.549 | 0.98 | 380.61 | -4.59 | 3.13 |
| TwinValley | G2 | 10/15/2019 | 63.6847 | 1 | 143.74 | -3.1 | 2 |
| TwinValley | G2 | 11/19/2019 | 102.823 | 1 | 218.85 | -2.96 | 2.01 |
| TwinValley | G2 | 1/7/2020 | 29.8392 | 1 | 65.3 | -2.62 | 1.34 |
| TwinValley | G2 | 2/26/2020 | 218.913 | 0.99 | 615.97 | -3.97 | 2.48 |
| TwinValley | G2 | 5/5/2020 | 21.4353 | 0.95 | 52.47 | -3.88 | 2.92 |
| TwinValley | G2 | 6/12/2020 | 10.5684 | 0.88 | 15.26 | -2.31 | 2.32 |
| TwinValley | G2 | 7/30/2020 | 16.3532 | 0.99 | 34.57 | -3.65 | 3.11 |
| TwinValley | G2 | 9/25/2020 | 19.4297 | 0.35 | 22.06 | -0.98 | 1.08 |
| TwinValley | G2 | 11/5/2020 | 2.19886 | 0.97 | 4.76 | -3.63 | 2.98 |
| TwinValley | G2 | 4/20/2021 | 2.4504 | 0.64 | 2.34 | 1.02 | -1.43 |
| TwinValley | G2 | 5/25/2021 | 4.9047 | 0.99 | 10.16 | -1.95 | 0.46 |
| TwinValley | G2 | 7/7/2021 | 17.9738 | 0.92 | 41.59 | -3.99 | 3.3 |
| TwinValley | G2 | 8/11/2021 | 10.0679 | 1 | 64.24 | -9.5 | 7.39 |
| TwinValley | G2 | 9/9/2021 | 2.92995 | 0.99 | 24.2 | -11.1 | 8.28 |
| TwinValley | G2 | 12/2/2021 | 1.01153 | 0.99 | 8.36 | -11.1 | 8.28 |
| TwinValley | G2 | 3/16/2022 | 1.84397 | 0.02 | 1.8 | -0.05 | NA |
| TwinValley | G2 | 5/16/2022 | 2.70637 | 0.77 | 7.81 | 2.69 | NA |
| TwinValley | G2 | 7/1/2022 | 4.46726 | 0.94 | 9.6 | 1.79 | NA |
| TwinValley | G2 | 8/24/2022 | 7.28627 | 1 | 73.65 | -13.45 | 10.73 |
| TwinValley | G2 | 10/19/2022 | 1.57004 | 0.96 | 3.15 | 1.61 | NA |
| TwinValley | G3 | 6/6/2019 | 242.238 | 1 | 926.78 | -5.98 | 4.35 |
| TwinValley | G3 | 6/27/2019 | 165.746 | 0.99 | 508.6 | -4.72 | 3.33 |
| TwinValley | G3 | 7/18/2019 | 46.2344 | 1 | 102.23 | -2.55 | 1.18 |
| TwinValley | G3 | 8/14/2019 | 159.786 | 1 | 435.95 | -3.84 | 2.4 |
| TwinValley | G3 | 9/26/2019 | 126.061 | 1 | 294.49 | -2.79 | 1.34 |
| TwinValley | G3 | 10/15/2019 | 66.8143 | 1 | 140.31 | -2.06 | 0.59 |
| TwinValley | G3 | 11/19/2019 | 94.8286 | 0.99 | 254.1 | -4.48 | 3.51 |
| TwinValley | G3 | 1/7/2020 | 25.7901 | 0.94 | 41.92 | -0.78 | -0.48 |
| TwinValley | G3 | 2/26/2020 | 202.21 | 1 | 616.73 | -4.73 | 3.37 |
| TwinValley | G3 | 5/5/2020 | 20.2033 | 0.82 | 32.13 | -1.34 | 0.53 |
| TwinValley | G3 | 6/12/2020 | 11.1784 | 0.88 | 10.62 | -0.45 | 0.8 |
| TwinValley | G3 | 7/30/2020 | 13.02 | 0.38 | 16.08 | 0.44 | NA |
| TwinValley | G3 | 9/25/2020 | 19.7706 | 0.99 | 19.87 | -0.78 | 1.13 |
| TwinValley | G3 | 11/5/2020 | 2.28061 | 0.32 | 1.83 | 0.98 | -0.83 |
| TwinValley | G3 | 12/8/2020 | 1.2101 | 0.53 | 1.9 | -1.94 | 1.51 |
| TwinValley | G3 | 4/20/2021 | 2.51727 | 0.84 | 2.45 | -0.2 | 0.37 |
| TwinValley | G3 | 5/25/2021 | 3.69169 | 0.77 | 4.32 | -1.28 | 1.43 |
| TwinValley | G3 | 7/7/2021 | 14.8437 | 0.86 | 11.8 | 0.71 | -0.39 |
| TwinValley | G3 | 8/11/2021 | 7.18992 | 0.73 | 8.88 | -1.18 | 1.12 |
| TwinValley | G3 | 9/9/2021 | 0.941465 | 0.95 | 2.06 | -1.93 | 0.17 |
| TwinValley | G3 | 12/2/2021 | 0.32503 | 0.95 | 0.71 | -1.93 | 0.17 |
| TwinValley | G3 | 3/16/2022 | 2.38339 | 0.98 | 2.09 | -0.26 | NA |
| TwinValley | G3 | 5/16/2022 | 2.70469 | 0.51 | 1.62 | 1.95 | -1.43 |
| TwinValley | G3 | 7/1/2022 | 3.23144 | 0.99 | 1.5 | 2.49 | -1.56 |
| TwinValley | G3 | 8/24/2022 | 2.69377 | 0.72 | 5.89 | 1.84 | NA |
| TwinValley | G3 | 10/19/2022 | 1.44323 | 0.81 | 3.45 | -4.29 | 3.64 |
| TwinValley | H1 | 6/6/2019 | 146.436 | 0.92 | 456.03 | -4.65 | 3.15 |
| TwinValley | H1 | 6/27/2019 | 195.004 | 1 | 479.69 | -3.18 | 1.77 |
| TwinValley | H1 | 7/18/2019 | 39.0734 | 1 | 89.95 | -3.1 | 1.93 |
| TwinValley | H1 | 8/14/2019 | 151.928 | 1 | 512.54 | -4.87 | 3.12 |
| TwinValley | H1 | 9/26/2019 | 124.179 | 0.97 | 425.18 | 3.3 | NA |
| TwinValley | H1 | 10/15/2019 | 72.3139 | 1 | 176.19 | -2.62 | 0.84 |
| TwinValley | H1 | 11/19/2019 | 95.8116 | 0.98 | 219.06 | -2.73 | 1.34 |
| TwinValley | H1 | 1/7/2020 | 31.2291 | 0.98 | 108.59 | -5.2 | 3.52 |
| TwinValley | H1 | 2/26/2020 | 241.644 | 1 | 594.54 | -2.48 | 0.54 |
| TwinValley | H1 | 5/5/2020 | 20.9247 | 1 | 45.58 | -2.21 | 0.67 |
| TwinValley | H1 | 6/12/2020 | 13.2834 | 0.97 | 20.24 | -0.75 | -0.26 |
| TwinValley | H1 | 7/30/2020 | 21.0832 | 0.97 | 48.78 | -2.92 | 1.61 |
| TwinValley | H1 | 9/25/2020 | 26.2935 | 1 | 35.44 | -0.38 | -0.39 |
| TwinValley | H1 | 11/5/2020 | 2.1705 | 0.34 | 2.43 | 0.23 | NA |
| TwinValley | H1 | 12/8/2020 | 1.25561 | 0.58 | 1.98 | -2.27 | 2 |
| TwinValley | H1 | 4/20/2021 | 2.81241 | 0.97 | 3.81 | -0.76 | 0.19 |
| TwinValley | H1 | 5/25/2021 | 6.10967 | 0.88 | 14.77 | -3.74 | 2.75 |
| TwinValley | H1 | 7/7/2021 | 19.0923 | 0.94 | 44.32 | -3.04 | 1.79 |
| TwinValley | H1 | 8/11/2021 | 10.8766 | 0.99 | 32.62 | -4.24 | 2.64 |
| TwinValley | H1 | 9/9/2021 | 1.61915 | 0.72 | 3.32 | -2.95 | 2.14 |
| TwinValley | H1 | 12/2/2021 | 0.558993 | 0.72 | 1.14 | -2.95 | 2.14 |
| TwinValley | H1 | 5/16/2022 | 3.03302 | 0.88 | 5.15 | -1.76 | 0.95 |
| TwinValley | H1 | 7/1/2022 | 3.34693 | 0.38 | 3.5 | -0.21 | 0.18 |
| TwinValley | H1 | 8/24/2022 | 2.79451 | 0.96 | 13.57 | -8.55 | 7.31 |
| TwinValley | H1 | 10/19/2022 | 1.38204 | 0.19 | 1.44 | -0.68 | 0.89 |
| TwinValley | H2 | 6/6/2019 | 167.272 | 0.99 | 768.34 | -7.14 | 5.35 |
| TwinValley | H2 | 6/27/2019 | 224.271 | 0.94 | 554.69 | -3.4 | 2.11 |
| TwinValley | H2 | 7/18/2019 | 36.6595 | 0.93 | 76.75 | -2.53 | 1.38 |
| TwinValley | H2 | 8/14/2019 | 191.96 | 0.99 | 646.91 | -4.81 | 3.02 |
| TwinValley | H2 | 9/26/2019 | 147.599 | 0.97 | 493.64 | -4.94 | 3.29 |
| TwinValley | H2 | 10/15/2019 | 78.618 | 0.95 | 194.4 | -3.22 | 1.81 |
| TwinValley | H2 | 11/19/2019 | 114.932 | 1 | 307.95 | -3.67 | 2.2 |
| TwinValley | H2 | 1/7/2020 | 38.8354 | 0.99 | 96.91 | -5.07 | 4.65 |
| TwinValley | H2 | 2/26/2020 | 233.985 | 0.96 | 459.95 | -1.14 | -0.73 |
| TwinValley | H2 | 5/5/2020 | 21.2507 | 1 | 53.64 | -3.26 | 1.78 |
| TwinValley | H2 | 6/12/2020 | 12.1034 | 0.96 | 23.52 | -2.67 | 1.9 |
| TwinValley | H2 | 7/30/2020 | 26.0255 | 1 | 101.06 | -5.78 | 3.94 |
| TwinValley | H2 | 9/25/2020 | 24.695 | 1 | 43.66 | 1.27 | NA |
| TwinValley | H2 | 11/5/2020 | 2.1715 | 0.91 | 5.03 | 2 | NA |
| TwinValley | H2 | 12/8/2020 | 0.944081 | 0.8 | 4.68 | -10.52 | 10.01 |
| TwinValley | H2 | 4/20/2021 | 3.55647 | 0.98 | 5.48 | -1.49 | 0.89 |
| TwinValley | H2 | 5/25/2021 | 6.631 | 1 | 18.19 | -3.74 | 2.2 |
| TwinValley | H2 | 7/7/2021 | 25.4612 | 0.98 | 129.04 | -8.14 | 6.46 |
| TwinValley | H2 | 8/11/2021 | 7.54986 | 0.97 | 18.65 | -3.54 | 2.35 |
| TwinValley | H2 | 9/9/2021 | 1.14926 | 0.96 | 1.22 | 1.93 | -3.36 |
| TwinValley | H2 | 12/2/2021 | 0.396767 | 0.96 | 0.42 | 1.93 | -3.36 |
| TwinValley | H2 | 3/16/2022 | 1.65674 | 0.95 | 0.64 | 3.74 | -2.9 |
| TwinValley | H2 | 5/16/2022 | 3.06755 | 0.99 | 5.36 | -2.28 | 1.67 |
| TwinValley | H2 | 7/1/2022 | 3.91367 | 1 | 5.59 | -1.37 | 0.95 |
| TwinValley | H2 | 8/24/2022 | 3.03346 | 0.99 | 15.22 | 4.98 | NA |
| TwinValley | H2 | 10/19/2022 | 1.34052 | 0.99 | 0.82 | 0.9 | 0 |
| TwinValley | H3 | 6/6/2019 | 168.691 | 1 | 565.7 | -4.62 | 2.72 |
| TwinValley | H3 | 6/27/2019 | 265.086 | 0.98 | 908.41 | -5.18 | 3.56 |
| TwinValley | H3 | 7/18/2019 | 36.5475 | 0.99 | 57.68 | -1.41 | 0.68 |
| TwinValley | H3 | 8/14/2019 | 157.676 | 0.96 | 340.89 | -2.52 | 1.23 |
| TwinValley | H3 | 9/26/2019 | 148.938 | 0.97 | 387.64 | -3.5 | 2.05 |
| TwinValley | H3 | 10/15/2019 | 107.952 | 0.99 | 252.47 | 2.03 | NA |
| TwinValley | H3 | 11/19/2019 | 107.854 | 0.98 | 278.31 | -3.78 | 2.54 |
| TwinValley | H3 | 1/7/2020 | 39.0295 | 0.11 | 46.38 | 0.36 | NA |
| TwinValley | H3 | 2/26/2020 | 142.692 | 0.74 | 18.04 | 19.6 | -30.01 |
| TwinValley | H3 | 5/5/2020 | 23.2433 | 1 | 41.43 | -1.93 | 1.06 |
| TwinValley | H3 | 6/12/2020 | 10.7746 | 0.25 | 10.57 | -0.39 | 0.62 |
| TwinValley | H3 | 7/30/2020 | 16.027 | 0.95 | 21.82 | -1.04 | 0.61 |
| TwinValley | H3 | 9/25/2020 | 25.146 | 0.53 | 23.12 | -0.17 | NA |
| TwinValley | H3 | 11/5/2020 | 3.35255 | 0.96 | 21.01 | -10.5 | 9.09 |
| TwinValley | H3 | 12/8/2020 | 0.347782 | 0.99 | 0.64 | -3.97 | 3.99 |
| TwinValley | H3 | 4/20/2021 | 2.58077 | 0.85 | 1.6 | 1.84 | -1.37 |
| TwinValley | H3 | 5/25/2021 | 5.86962 | 0.91 | 9.11 | -1.87 | 1.45 |
| TwinValley | H3 | 7/7/2021 | 14.5661 | 0.33 | 15.37 | -0.16 | 0.08 |
| TwinValley | H3 | 8/11/2021 | 6.55682 | 0.5 | 8.5 | 0.54 | NA |
| TwinValley | H3 | 9/9/2021 | 0.935617 | 0.84 | 0.76 | 0.29 | 0.18 |
| TwinValley | H3 | 12/2/2021 | 0.323011 | 0.84 | 0.26 | 0.29 | 0.18 |
| TwinValley | H3 | 5/16/2022 | 2.74602 | 0.94 | 3.45 | -0.52 | 0.08 |
| TwinValley | H3 | 7/1/2022 | 2.29277 | 1 | 0.38 | 6.27 | -4.48 |
| TwinValley | H3 | 8/24/2022 | 1.92796 | 0.9 | 15.76 | 8.17 | NA |
| TwinValley | H3 | 10/19/2022 | 1.05441 | 0.77 | 0.48 | 2.14 | -0.99 |
| TwinValley | I1 | 6/6/2019 | 148.162 | 1 | 481.7 | -4.84 | 3.26 |
| TwinValley | I1 | 6/27/2019 | 273.265 | 1 | 639.52 | -2.52 | 0.87 |
| TwinValley | I1 | 7/18/2019 | 38.5906 | 1 | 80.81 | -2.5 | 1.34 |
| TwinValley | I1 | 8/14/2019 | 194.427 | 0.99 | 570.96 | -4.27 | 2.79 |
| TwinValley | I1 | 9/26/2019 | 134.213 | 0.98 | 412.75 | -4.73 | 3.33 |
| TwinValley | I1 | 10/15/2019 | 99.7135 | 1 | 196.49 | -2 | 0.76 |
| TwinValley | I1 | 11/19/2019 | 119.13 | 1 | 309.97 | -3.57 | 2.17 |
| TwinValley | I1 | 1/7/2020 | 35.7591 | 0.98 | 81.83 | -2.57 | 1.06 |
| TwinValley | I1 | 2/26/2020 | 225.337 | 1 | 364.34 | -0.75 | -0.51 |
| TwinValley | I1 | 5/5/2020 | 24.9944 | 1 | 76.53 | -2.72 | -0.35 |
| TwinValley | I1 | 6/12/2020 | 11.8607 | 0.91 | 17.2 | -1.28 | 0.77 |
| TwinValley | I1 | 7/30/2020 | 19.7467 | 0.97 | 49.65 | -4.14 | 3.22 |
| TwinValley | I1 | 9/25/2020 | 25.4875 | 0.93 | 41.52 | 1.07 | NA |
| TwinValley | I1 | 11/5/2020 | 2.47996 | 0.92 | 4.88 | 1.55 | NA |
| TwinValley | I1 | 12/8/2020 | 1.55901 | 1 | 2.6 | -4.38 | 4.79 |
| TwinValley | I1 | 4/20/2021 | 2.76979 | 0.94 | 3.85 | -1.38 | 1.07 |
| TwinValley | I1 | 5/25/2021 | 8.48086 | 0.94 | 17.98 | -2.88 | 1.9 |
| TwinValley | I1 | 7/7/2021 | 21.3022 | 0.97 | 58.79 | -4.56 | 3.51 |
| TwinValley | I1 | 8/11/2021 | 9.64939 | 0.99 | 33.69 | -5.33 | 3.73 |
| TwinValley | I1 | 9/9/2021 | 1.74254 | 0.75 | 2.58 | -2.26 | 2.17 |
| TwinValley | I1 | 12/2/2021 | 0.601592 | 0.75 | 0.89 | -2.26 | 2.17 |
| TwinValley | I1 | 3/16/2022 | 2.01047 | 0.36 | 1.68 | 0.09 | 0.38 |
| TwinValley | I1 | 5/16/2022 | 2.82873 | 0.81 | 4.58 | -2.37 | 2.06 |
| TwinValley | I1 | 7/1/2022 | 3.36451 | 0.96 | 2.2 | 1.43 | -0.9 |
| TwinValley | I1 | 10/19/2022 | 1.53039 | 0.76 | 2.13 | -1.4 | 1.08 |
| TwinValley | I2 | 6/6/2019 | 146.299 | 0.99 | 528.78 | -5.97 | 4.61 |
| TwinValley | I2 | 6/27/2019 | 313.111 | 0.99 | 777.92 | -2.92 | 1.29 |
| TwinValley | I2 | 7/18/2019 | 41.5516 | 0.99 | 93.24 | -2.64 | 1.27 |
| TwinValley | I2 | 8/14/2019 | 187.138 | 0.99 | 452.18 | -2.9 | 1.37 |
| TwinValley | I2 | 9/26/2019 | 134.894 | 0.94 | 372.08 | 2.54 | NA |
| TwinValley | I2 | 10/15/2019 | 106.288 | 0.95 | 296.17 | -3.91 | 2.42 |
| TwinValley | I2 | 11/19/2019 | 122.484 | 1 | 298.26 | -2.95 | 1.42 |
| TwinValley | I2 | 1/7/2020 | 48.6816 | 0.99 | 99.77 | -3.23 | 2.56 |
| TwinValley | I2 | 2/26/2020 | 206.569 | 0.91 | 308 | -0.03 | -1.4 |
| TwinValley | I2 | 5/5/2020 | 24.9931 | 1 | 66.98 | -3.39 | 1.73 |
| TwinValley | I2 | 6/12/2020 | 12.953 | 1 | 28.13 | -2.35 | 0.93 |
| TwinValley | I2 | 7/30/2020 | 22.6221 | 1 | 73.39 | -5.02 | 3.57 |
| TwinValley | I2 | 9/25/2020 | 30.9566 | 0.99 | 67.55 | -2.82 | 1.69 |
| TwinValley | I2 | 11/5/2020 | 3.00874 | 0.92 | 7.13 | -3.49 | 2.44 |
| TwinValley | I2 | 12/8/2020 | 1.55595 | 0.86 | 5.1 | -5.54 | 4.35 |
| TwinValley | I2 | 4/20/2021 | 3.31541 | 0.98 | 5.77 | -1.84 | 0.99 |
| TwinValley | I2 | 5/25/2021 | 8.85582 | 0.98 | 26.77 | -4.72 | 3.39 |
| TwinValley | I2 | 7/7/2021 | 20.0345 | 0.99 | 51.81 | -3.74 | 2.48 |
| TwinValley | I2 | 8/11/2021 | 10.5941 | 1 | 43.17 | -6.68 | 5.19 |
| TwinValley | I2 | 9/9/2021 | 2.34915 | 1 | 7.24 | -5.38 | 4.35 |
| TwinValley | I2 | 12/2/2021 | 0.811017 | 1 | 2.5 | -5.38 | 4.35 |
| TwinValley | I2 | 3/16/2022 | 1.93042 | 0.9 | 1.28 | -0.77 | NA |
| TwinValley | I2 | 5/16/2022 | 2.47384 | 0.76 | 3.72 | 0.88 | NA |
| TwinValley | I2 | 7/1/2022 | 3.31506 | 1 | 4.01 | -1.07 | 1.02 |
| TwinValley | I2 | 10/19/2022 | 1.73964 | 0.92 | 18.78 | 10.8 | NA |
| TwinValley | I3 | 6/6/2019 | 141.834 | 0.99 | 413.54 | -4.12 | 2.56 |
| TwinValley | I3 | 6/27/2019 | 361.514 | 0.99 | 1120.26 | -4.42 | 2.77 |
| TwinValley | I3 | 7/18/2019 | 48.7681 | 0.99 | 138.3 | -4.31 | 3.01 |
| TwinValley | I3 | 8/14/2019 | 261.235 | 0.99 | 1006.27 | -5.69 | 3.84 |
| TwinValley | I3 | 9/26/2019 | 153.716 | 0.99 | 495.85 | -4.3 | 2.36 |
| TwinValley | I3 | 10/15/2019 | 115.117 | 0.99 | 341.98 | -3.73 | 1.8 |
| TwinValley | I3 | 11/19/2019 | 142.422 | 0.99 | 371.87 | -3.56 | 2.13 |
| TwinValley | I3 | 1/7/2020 | 47.4929 | 0.99 | 117.38 | -3.59 | 2.42 |
| TwinValley | I3 | 2/26/2020 | 144.96 | 0.63 | 22.27 | 17.65 | -26.43 |
| TwinValley | I3 | 5/5/2020 | 34.9035 | 0.3 | 61.74 | 1.27 | NA |
| TwinValley | I3 | 6/12/2020 | 14.7319 | 0.42 | 21.55 | -1.63 | 1.28 |
| TwinValley | I3 | 7/30/2020 | 25.5192 | 0.98 | 53.71 | -2.8 | 1.8 |
| TwinValley | I3 | 9/25/2020 | 39.3671 | 0.78 | 48.26 | -0.55 | 0.2 |
| TwinValley | I3 | 11/5/2020 | 3.51268 | 0.95 | 6.43 | -2.07 | 1.17 |
| TwinValley | I3 | 12/8/2020 | 1.82621 | 0.93 | 4.17 | -3.36 | 2.38 |
| TwinValley | I3 | 4/20/2021 | 3.60692 | 0.96 | 4.37 | -0.23 | -0.26 |
| TwinValley | I3 | 5/25/2021 | 8.9847 | 0.92 | 17.26 | -2.59 | 1.82 |
| TwinValley | I3 | 7/7/2021 | 24.3929 | 0.95 | 79.92 | -5.55 | 4.37 |
| TwinValley | I3 | 8/11/2021 | 10.9939 | 1 | 38.37 | -5.59 | 4.16 |
| TwinValley | I3 | 9/9/2021 | 1.58133 | 0.82 | 5.95 | -6.91 | 5.89 |
| TwinValley | I3 | 12/2/2021 | 0.545937 | 0.82 | 2.05 | -6.91 | 5.89 |
| TwinValley | I3 | 3/16/2022 | 4.52983 | 0.98 | 0.75 | -2.93 | NA |
| TwinValley | I3 | 5/16/2022 | 3.26711 | 0.94 | 7.22 | -3.83 | 3.21 |
| TwinValley | I3 | 7/1/2022 | 4.99916 | 0.97 | 10.28 | -2.72 | 1.76 |
| TwinValley | I3 | 8/24/2022 | 3.70709 | 0.96 | 24.22 | -10.58 | 9 |
| TwinValley | I3 | 10/19/2022 | 2.01719 | 0.76 | 3.37 | -2.4 | 2 |

Table S2. Annual decrease in horizontal sediment flux measured at the plot level. P values show the probability that the slope of the line is zero.

| **Site** | **Annual decrease in daily average sediment flux (g m-2 d-1)** | **P value** |
| --- | --- | --- |
| Saylor Creek | 1888.5 | <0.001 |
| Scooby | 143.1 | <0.001 |
| Owyhee | 78.8 | <0.001 |
| Rock Creek | 3.8 | 0.003 |
| Strawberry | 9.7 | <0.001 |
| Red Hills | 209.4 | <0.001 |
| Twin Valley | 1440.8 | <0.001 |
|  |  |  |
|  |  |  |

Table S3. Percentage of all 860 measured transects categorized as plant community 1,2,3, or 4.

| **Site** | **Plant community 1** | **Plant community 2** | **Plant community 3** | **Plant community 4** |
| --- | --- | --- | --- | --- |
| Owyhee | 3.14 | 5.7 | 2.33 | 1.4 |
| Red Hills | 0.12 | 1.28 | 0 | 0 |
| Rock Creek | 2.09 | 10.12 | 0.35 | 0 |
| Saylor Creek | 13.6 | 0.35 | 9.88 | 5.23 |
| Scooby | 5.23 | 8.84 | 6.16 | 8.84 |
| Strawberry | 1.16 | 4.07 | 8.72 | 0 |
| Twin Valley | 0.7 | 0.47 | 0.23 | 0 |


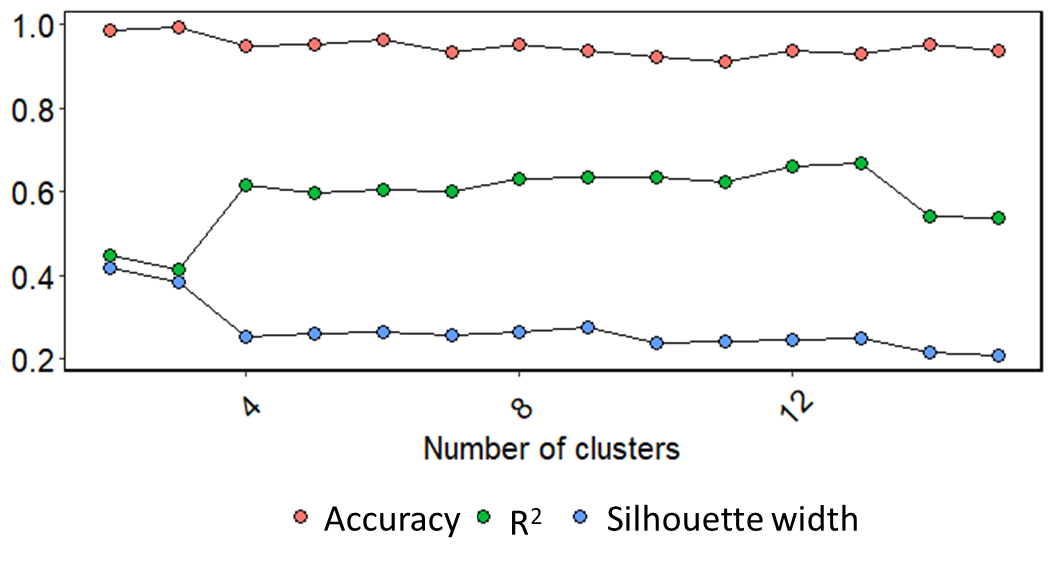


Figure 1. Comparison showing how changing the number of clusters between two and 15 changes clustering accuracy of k-fold validation, explained variance (R2) of the relationship between stability index and horizontal sediment flux, and silhouette width.


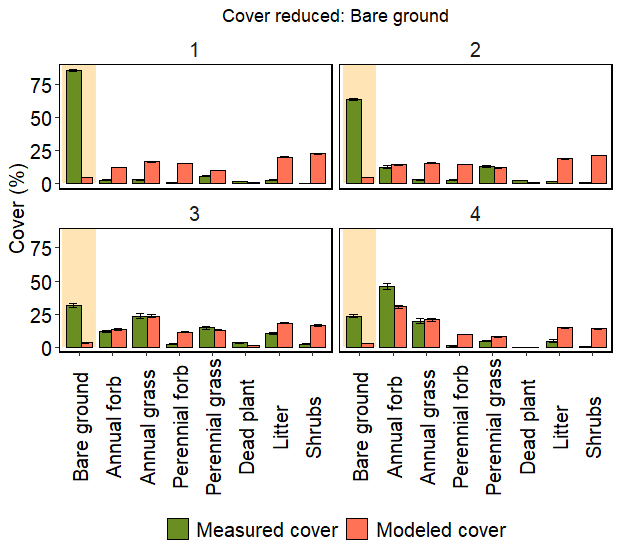


Figure 2. Comparison of modeled plant community to measured plant community resulting from reducing the cover of bare ground by 75% in plant communities one, two, three, and four.


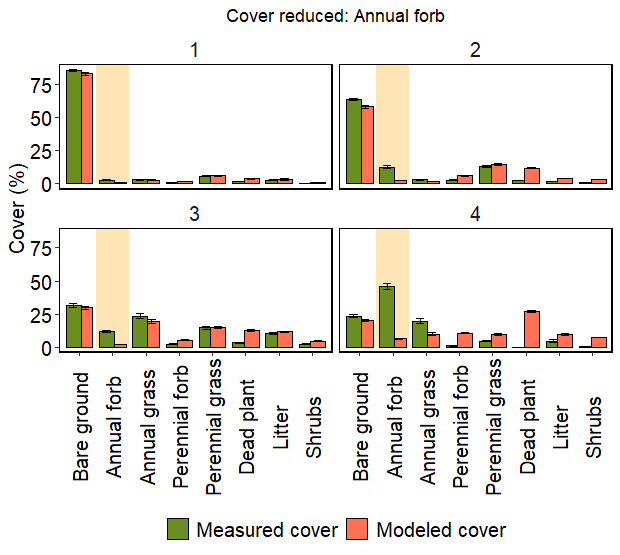


Figure 3. Comparison of modeled plant community to measured plant community resulting from reducing the cover of annual forbs by 75% in plant communities one, two, three, and four.


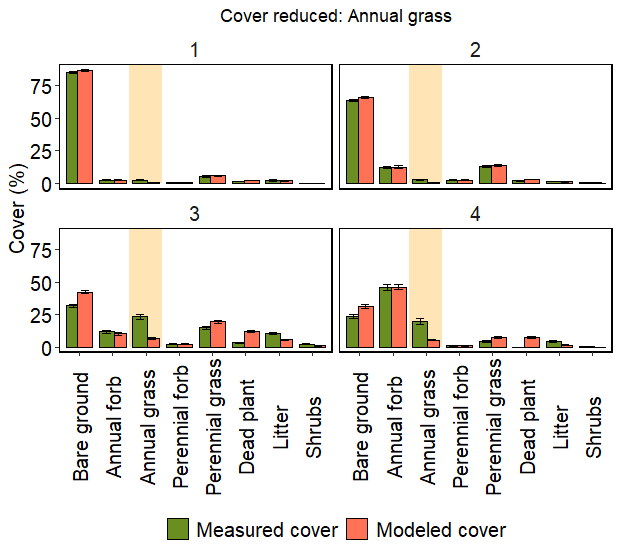


Figure 4. Comparison of modeled plant community to measured plant community resulting from reducing the cover of annual grasses by 75% in plant communities one, two, three, and four.


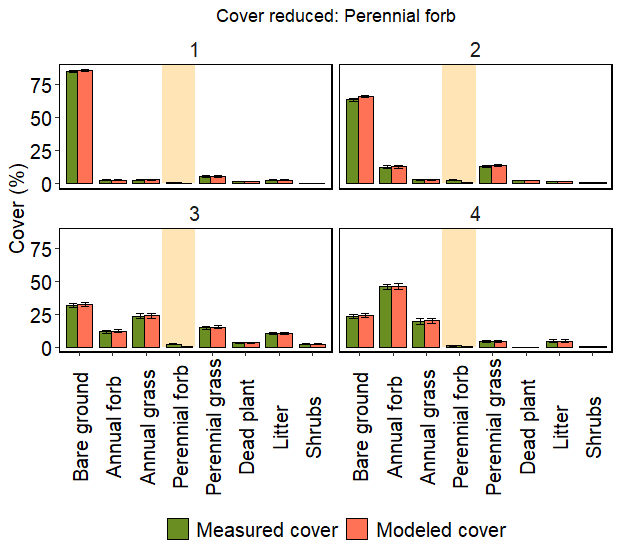


Figure 5. Comparison of modeled plant community to measured plant community resulting from reducing the cover of perennial forbs by 75% in plant communities one, two, three, and four.


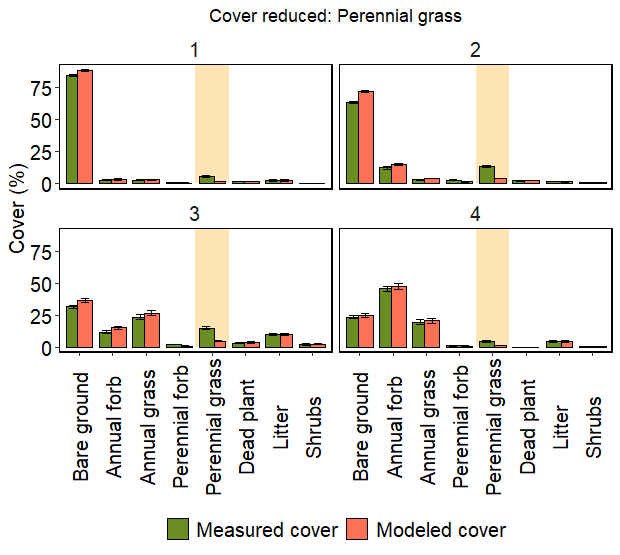


Figure 6. Comparison of modeled plant community to measured plant community resulting from reducing the cover of perennial grass by 75% in plant communities one, two, three, and four.


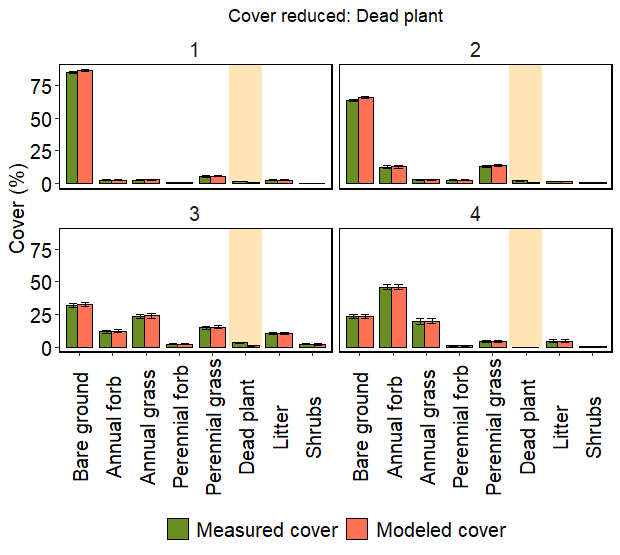


Figure 7. Comparison of modeled plant community to measured plant community resulting from reducing the cover of dead plants by 75% in plant communities one, two, three, and four.


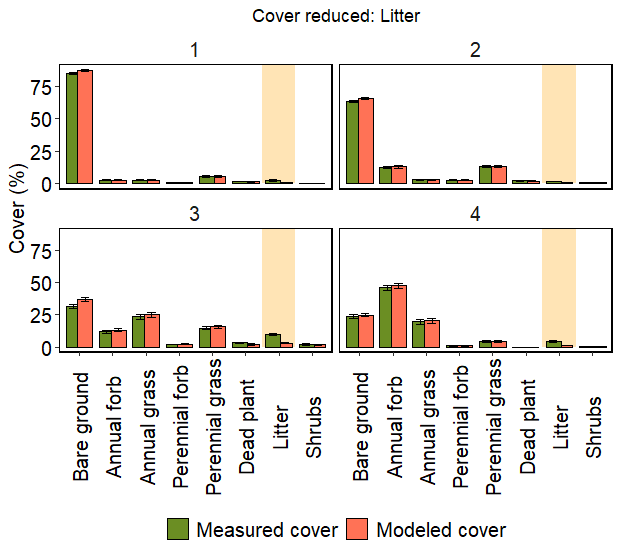


Figure 8. Comparison of modeled plant community to measured plant community resulting from reducing the cover of litter by 75% in plant communities one, two, three, and four.


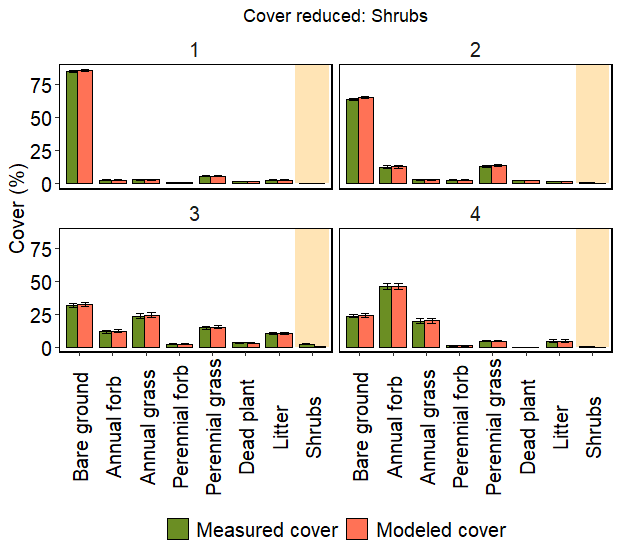


Figure 9. Comparison of modeled plant community to measured plant community resulting from reducing the cover of shrubs by 75% in plant communities one, two, three, and four.
